# Supplementary material for: Novel tacrine derivatives as potential CDK9 inhibitors with low cholinesterase inhibitory properties: design, synthesis, and biological evaluation
Source: Royal Society of Chemistry journal article supplement (doi:10.1039/d2nj03667c), 2022-01-01
Supplement: d2nj03667c1.pdf [file d2nj03667c1.pdf]

## SUPPORTING INFORMATION

### **Novel Tacrine Derivatives as Potential CDK9 Inhibitors with Low Cholinesterase Inhibitory Property: Design, Synthesis, and Biological Evaluation**

Wenwu Liu,<sup>‡ab</sup> Yaoguang Huang,<sup>‡b</sup> Limeng Wu,<sup>‡b</sup> Wenjie Liu,<sup>b</sup> Xiaowen Jiang,<sup>b</sup> Zihua Xu<sup>ac</sup> and Qingchun Zhao<sup>\*ab</sup>

<sup>a</sup> Teaching Hospital of Shenyang Pharmaceutical University, General Hospital of Northern Theater Command, Shenyang 110840, People's Republic of China

<sup>b</sup> School of Traditional Chinese Materia Medica, Shenyang Pharmaceutical University, Shenyang 110016, People's Republic of China

<sup>c</sup> School of Pharmacy, Shenyang Pharmaceutical University, Shenyang 110016, People's Republic of China

\* Corresponding authors:

Qingchun Zhao: E-mail address: zhaqingchun1967@163.com (Q.C. Zhao).

<sup>‡</sup>These authors contributed equally to this work.

Table S1 The L02 cells cytotoxicity of compounds **5a-5u**

| Comp.               | Inhibition % at 10 $\mu$ M or IC <sub>50</sub> ( $\mu$ M) |
|---------------------|-----------------------------------------------------------|
| <b>5a</b>           | 72.9%                                                     |
| <b>5b</b>           | 84.0%                                                     |
| <b>5c</b>           | 6.28                                                      |
| <b>5d</b>           | 4.61                                                      |
| <b>5e</b>           | 7.04                                                      |
| <b>5f</b>           | 0.91                                                      |
| <b>5g</b>           | 94.0%                                                     |
| <b>5h</b>           | 2.64                                                      |
| <b>5i</b>           | 2.87                                                      |
| <b>5j</b>           | > 10                                                      |
| <b>5k</b>           | 71.3%                                                     |
| <b>5l</b>           | > 10                                                      |
| <b>5m</b>           | 100%                                                      |
| <b>5n</b>           | 93.4%                                                     |
| <b>5o</b>           | 74.8%                                                     |
| <b>5p</b>           | 38.4%                                                     |
| <b>5q</b>           | 67.4%                                                     |
| <b>5r (ZLWT-48)</b> | 3.83                                                      |
| <b>5s</b>           | 60.0%                                                     |
| <b>5t</b>           | 63.7%                                                     |
| <b>5u</b>           | 72.9%                                                     |
| <b>Tacrine</b>      | > 100                                                     |
| <b>ZLWT-37</b>      | 0.26                                                      |
| <b>Dinaciclib</b>   | 0.014                                                     |

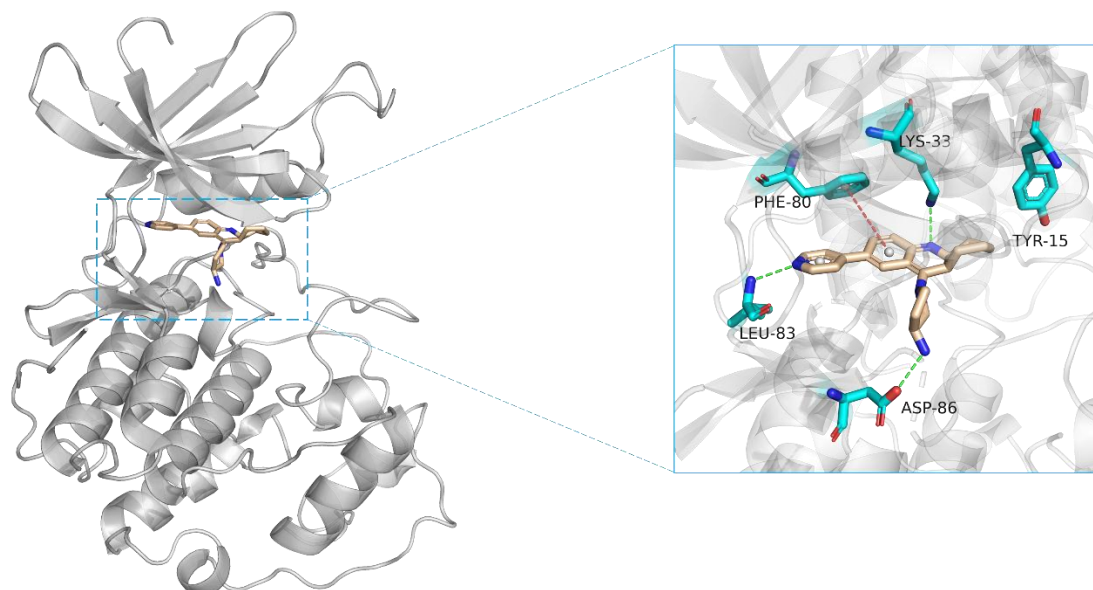

**Fig. S1** Docking pose of compound **ZLWT-48** in the binding site of CDK2 (PDB code:3EID). Docking was performed with Glide, and images were generated with Pymol. Green-dashed lines indicate H-bond interactions, red-dashed lines indicate hydrophobic interactions. The compound binding pocket with interacting residues was shown in stick mode (wheat).

<sup>1</sup>H NMR Spectra, <sup>13</sup>C NMR Spectra, HR-MS, and HPLC traces of Representative Compounds.

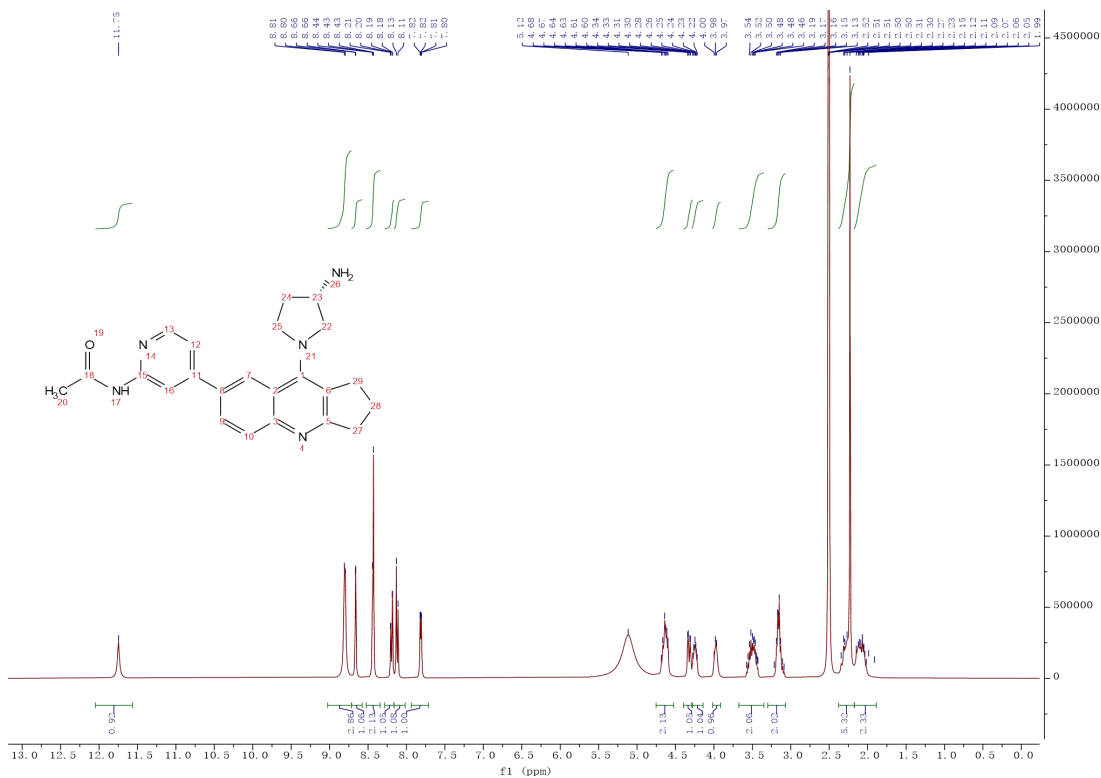

<sup>1</sup>H NMR spectrum of **5a** in DMSO-*d*<sub>6</sub>.

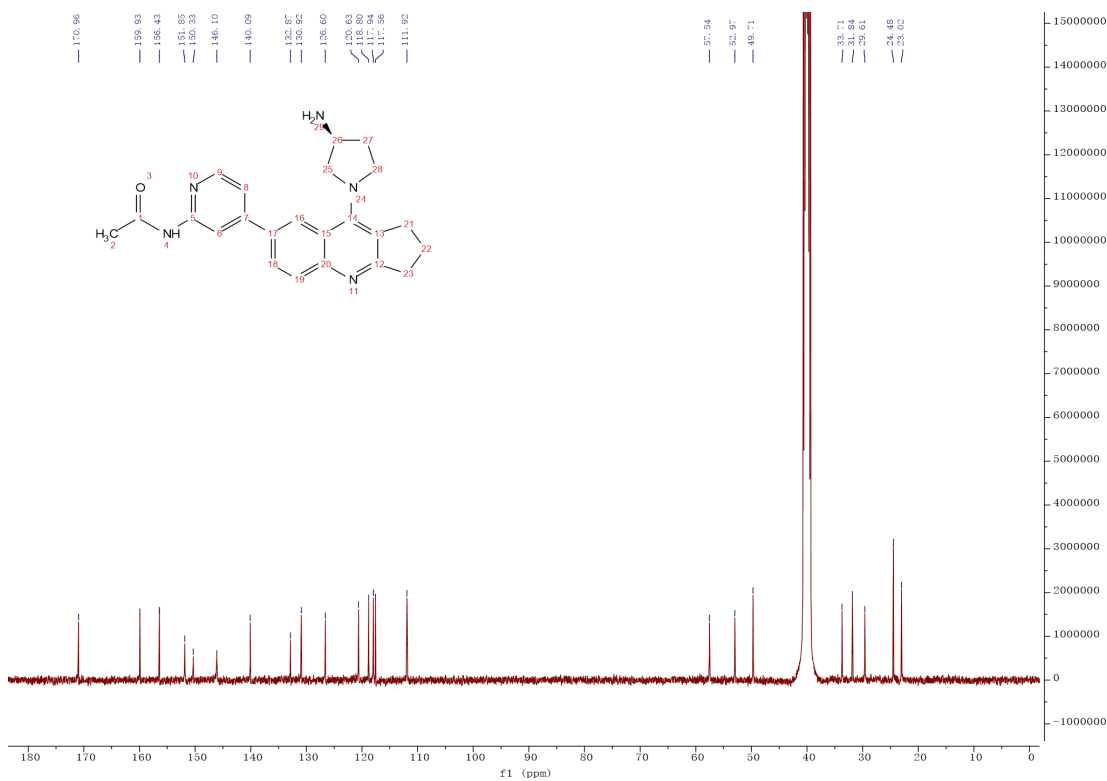

<sup>13</sup>C NMR spectrum of **5a** in DMSO-*d*<sub>6</sub>.

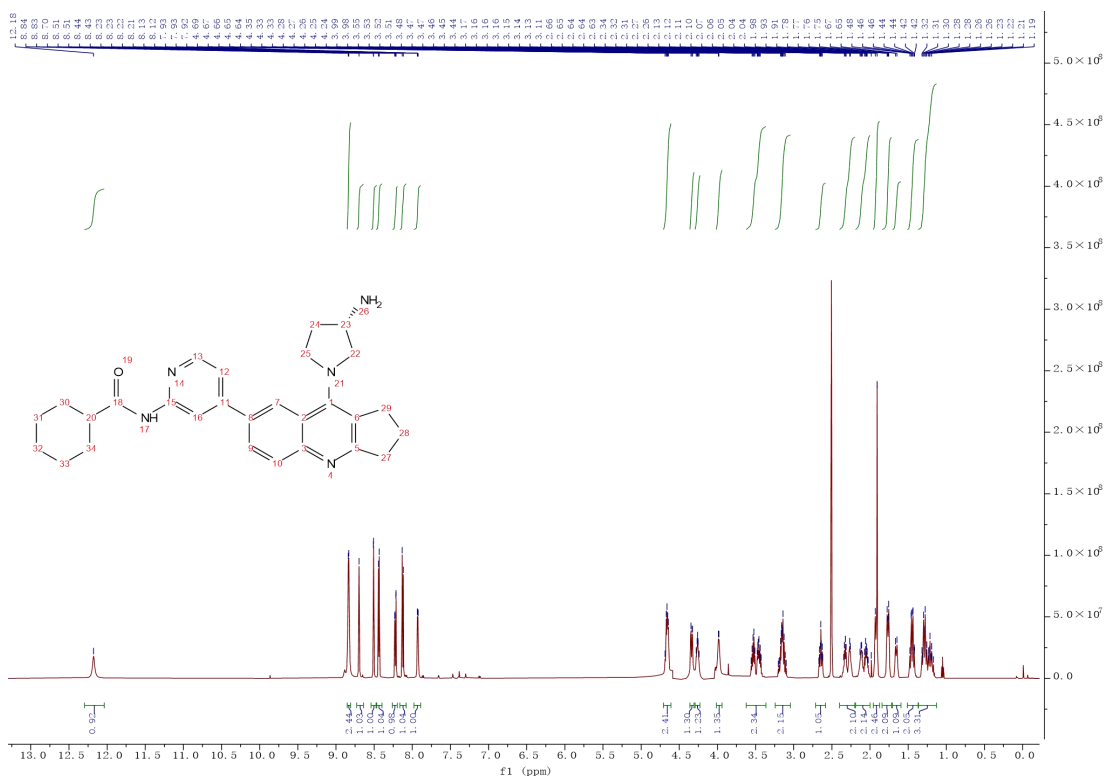

**<sup>1</sup>H NMR spectrum of 5b in DMSO-d<sub>6</sub>.**

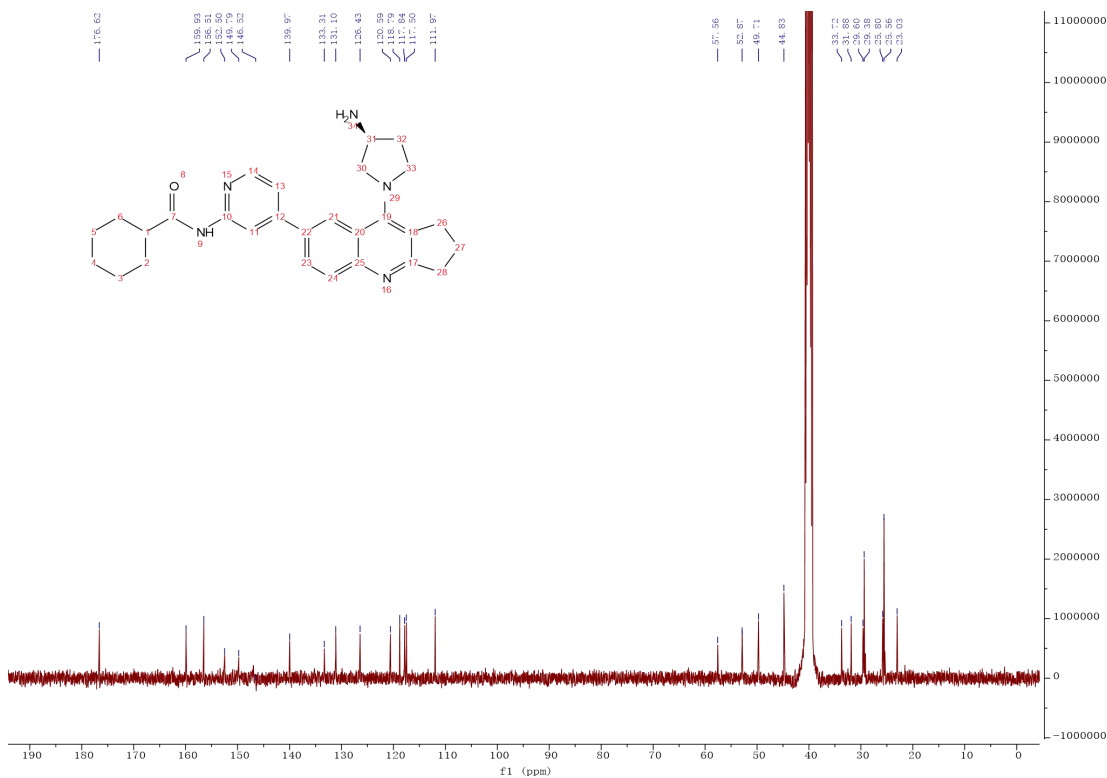

**<sup>13</sup>C NMR spectrum of 5b in DMSO-d<sub>6</sub>.**

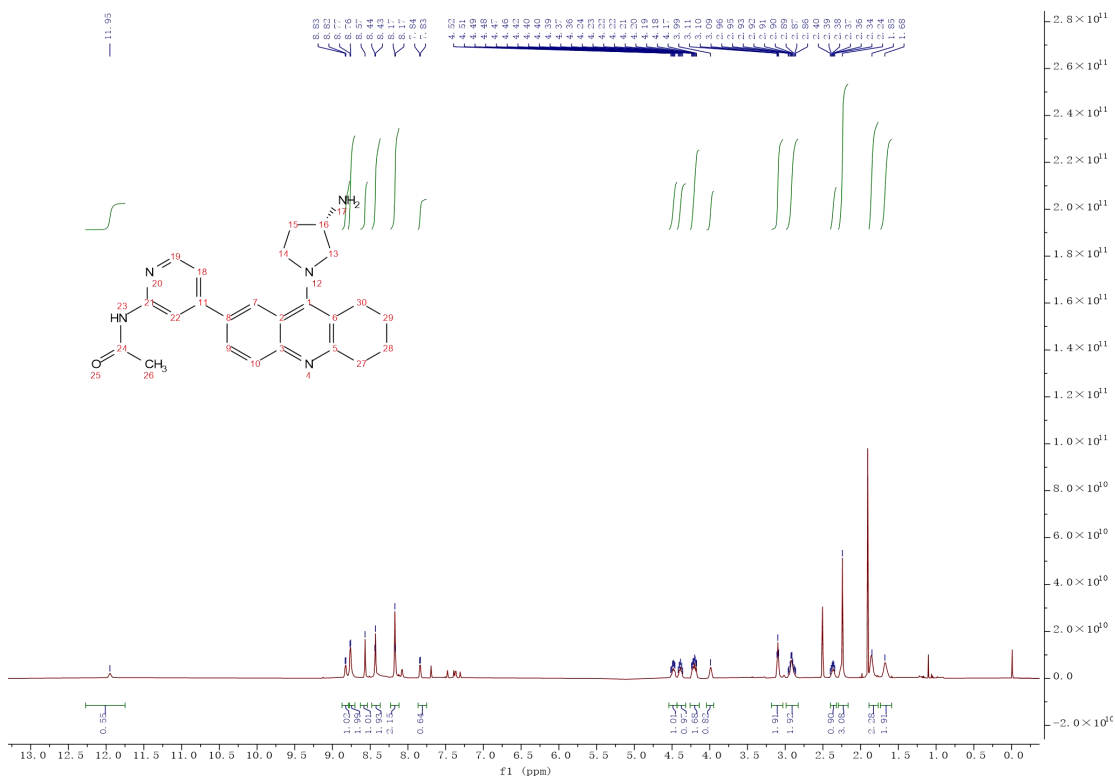

**<sup>1</sup>H NMR spectrum of 5c in DMSO-d<sub>6</sub>.**

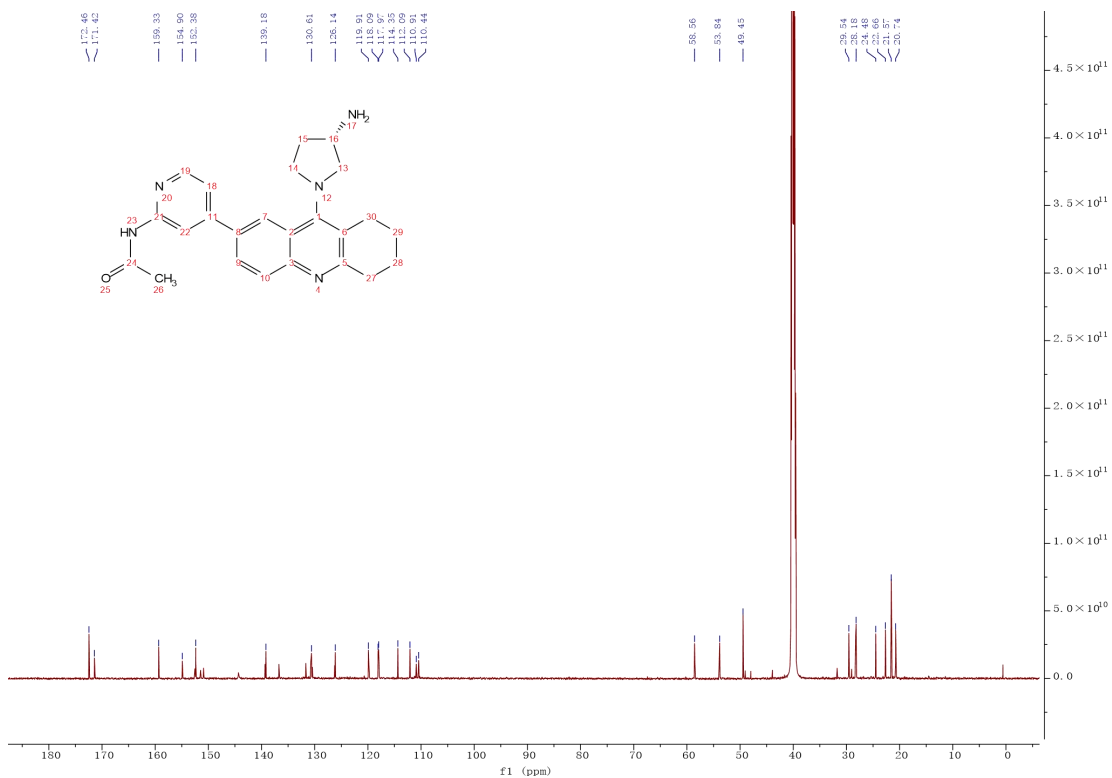

**<sup>13</sup>C NMR spectrum of 5c in DMSO-d<sub>6</sub>.**

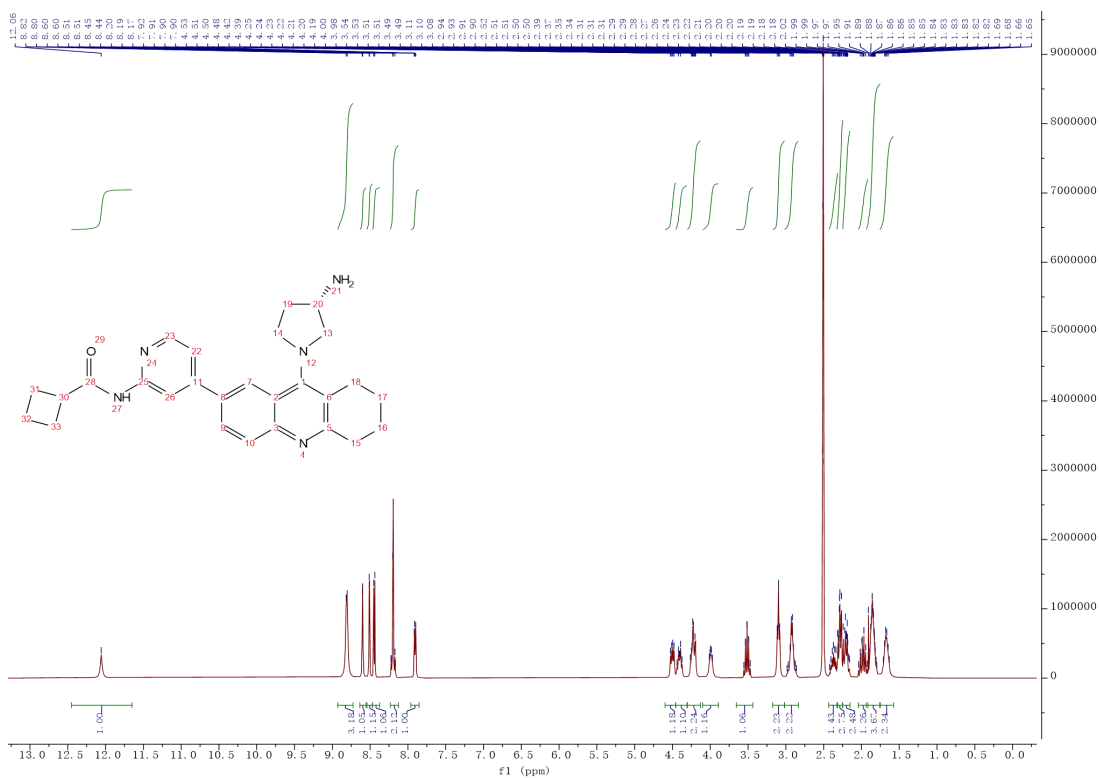

<sup>1</sup>H NMR spectrum of **5d** in DMSO-*d*<sub>6</sub>.

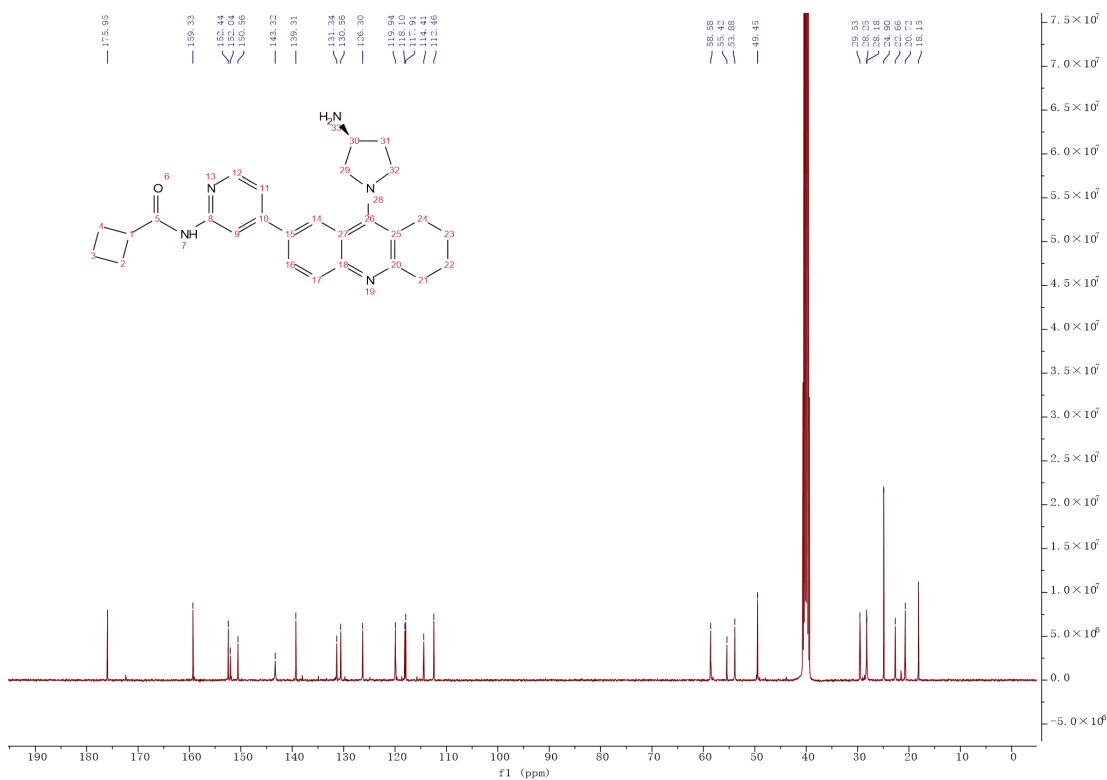

<sup>13</sup>C NMR spectrum of **5d** in DMSO-*d*<sub>6</sub>.

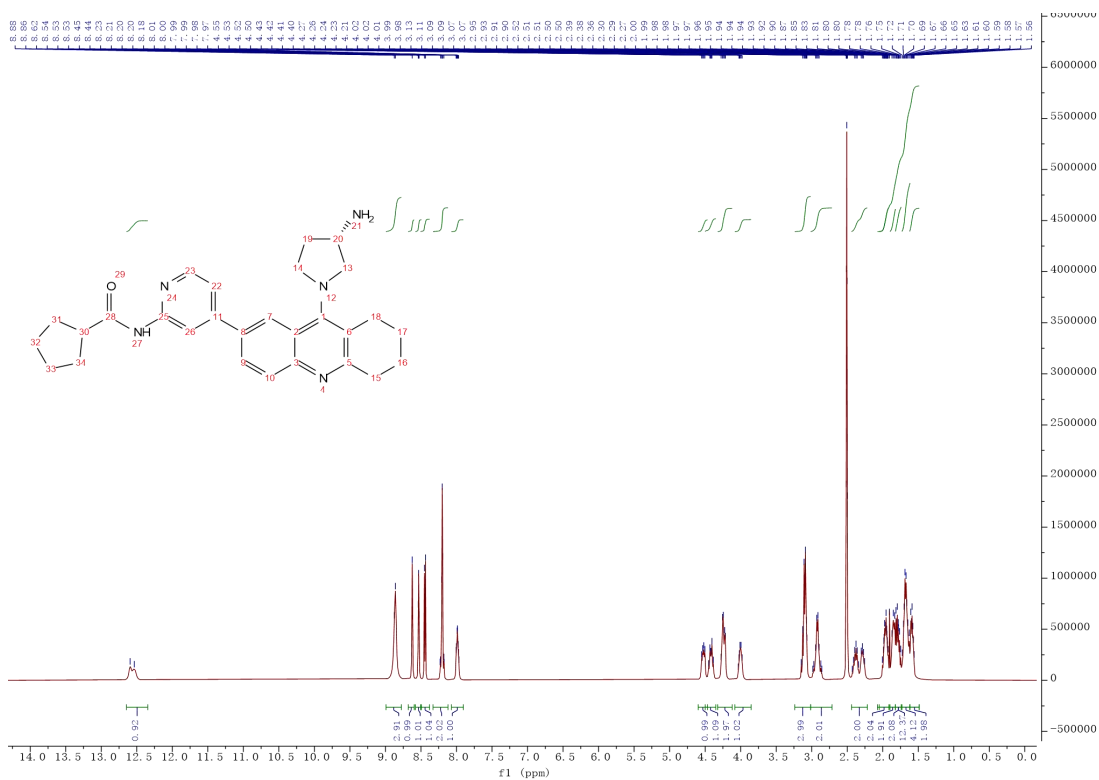

$^1\text{H}$  NMR spectrum of **5e** in DMSO- $d_6$ .

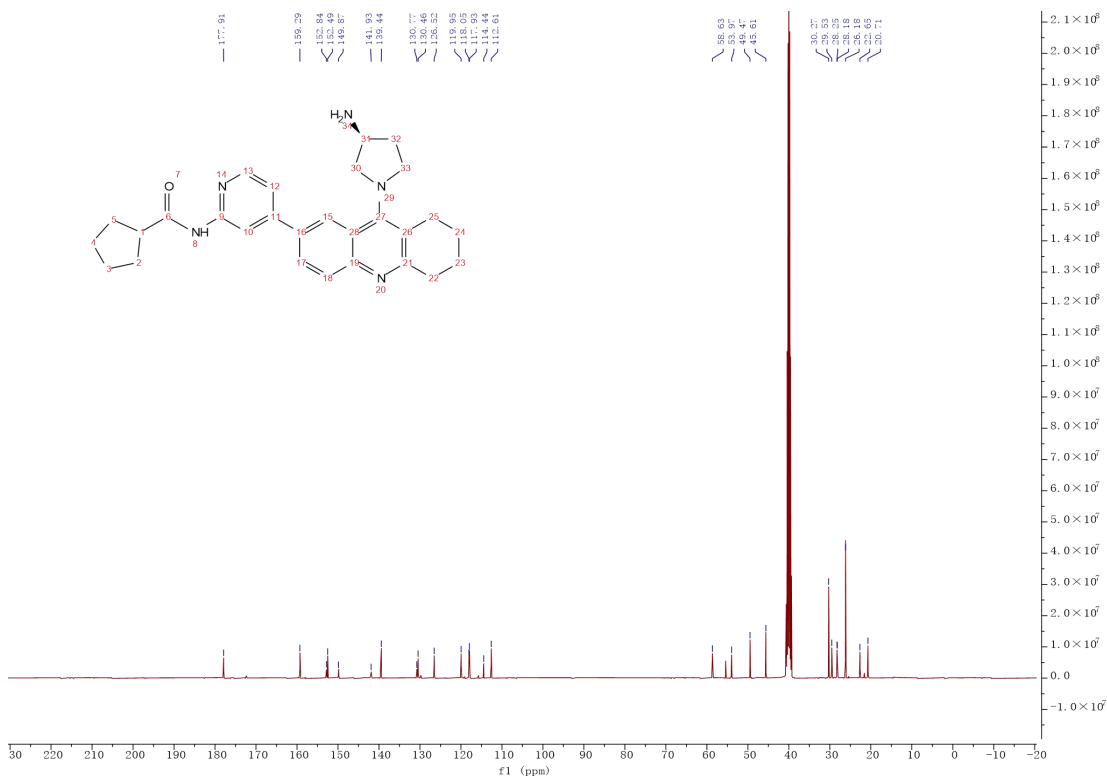

$^{13}\text{C}$  NMR spectrum of **5e** in DMSO- $d_6$ .



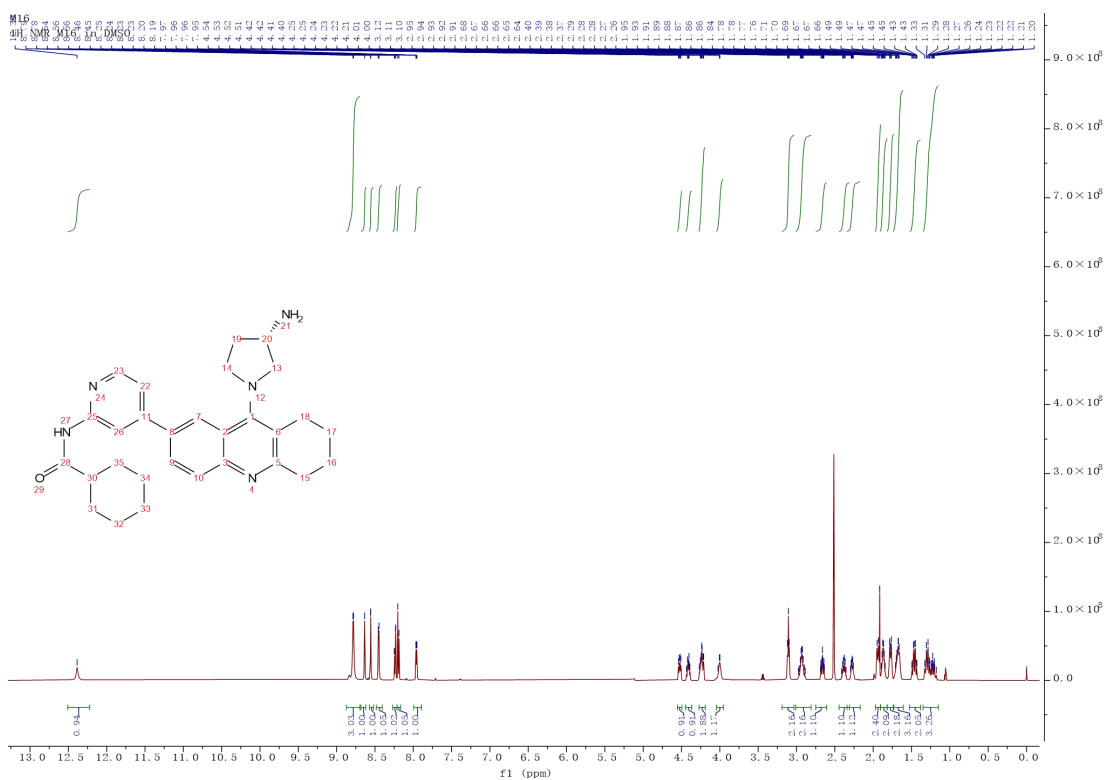

**<sup>1</sup>H NMR spectrum of 5f in DMSO-*d*<sub>6</sub>.**

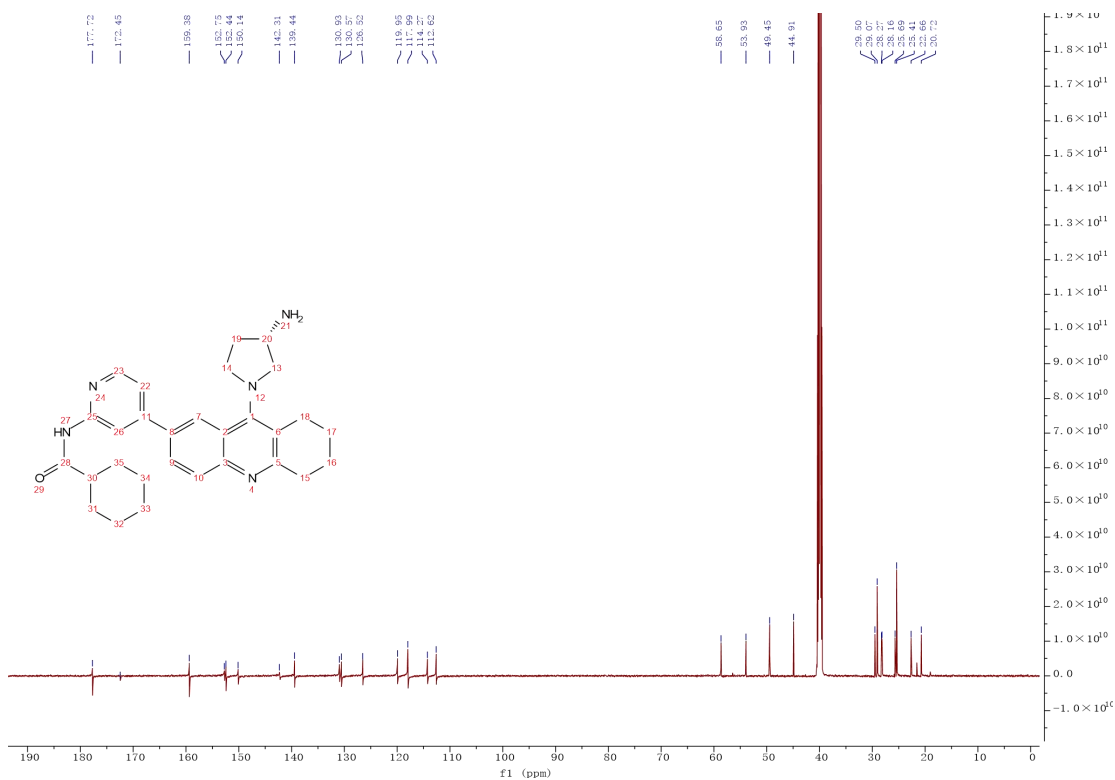

**<sup>13</sup>C NMR spectrum of 5f in DMSO-*d*<sub>6</sub>.**

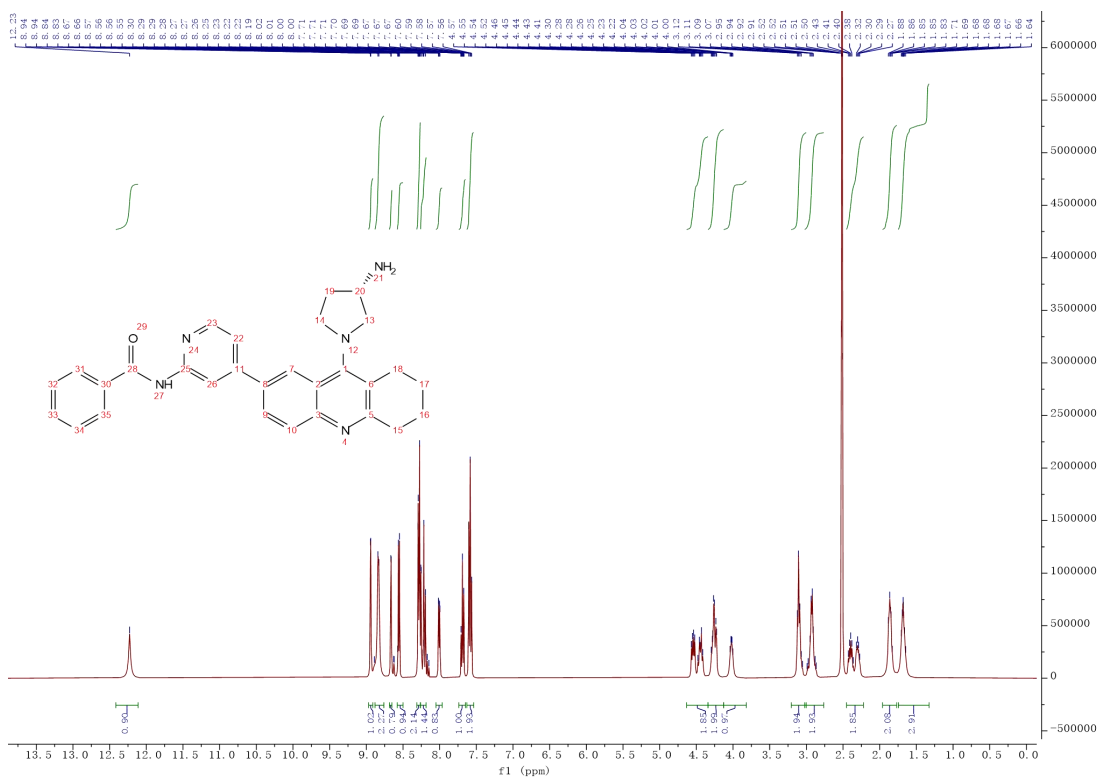

**<sup>1</sup>H NMR spectrum of 5g in DMSO-*d*<sub>6</sub>.**

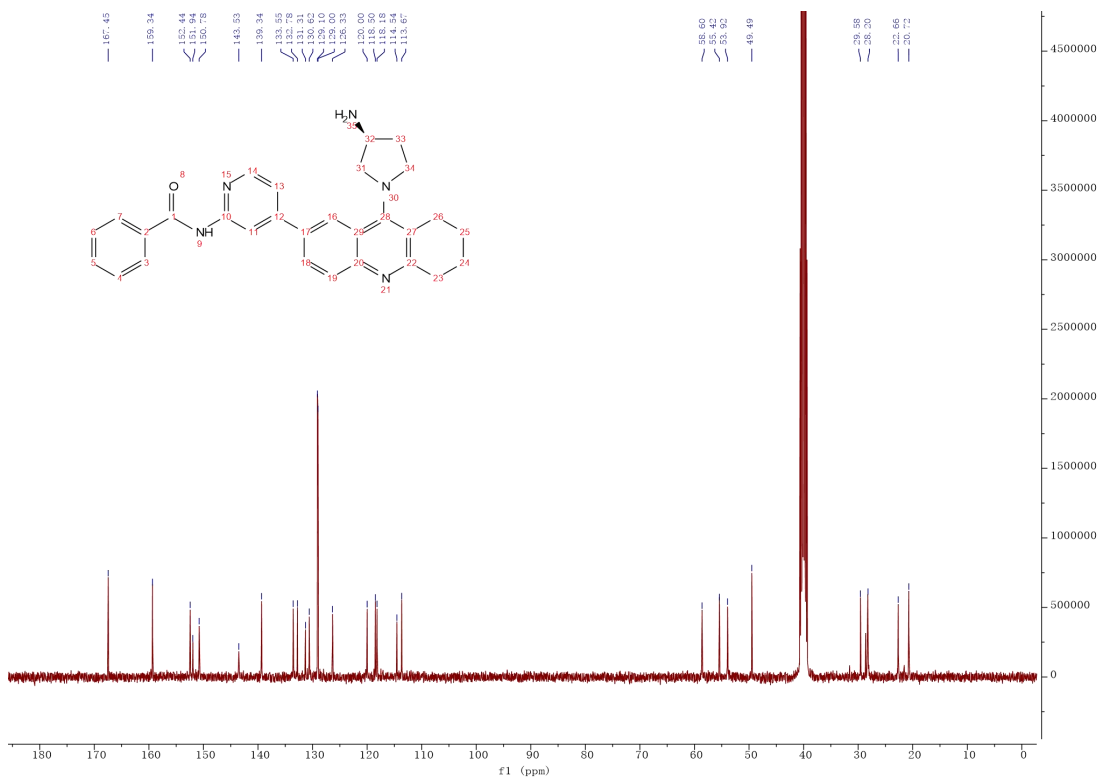

**<sup>13</sup>C NMR spectrum of 5g in DMSO-*d*<sub>6</sub>.**

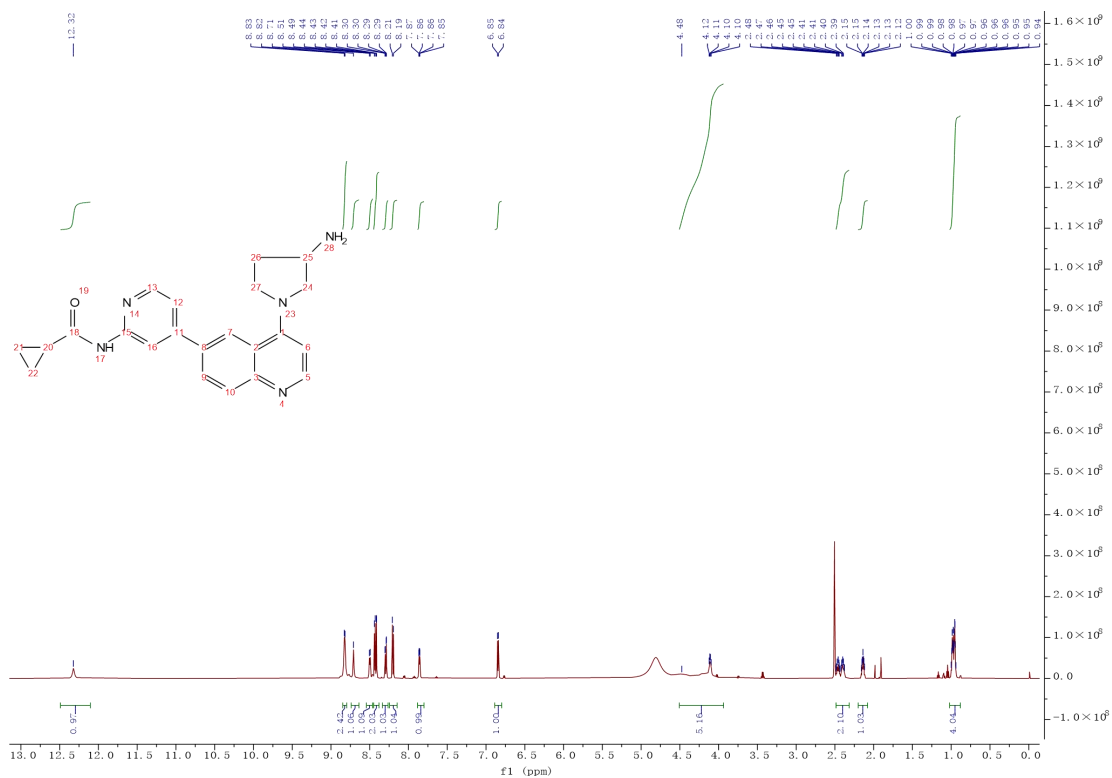

<sup>1</sup>H NMR spectrum of **5h** in DMSO-*d*<sub>6</sub>.

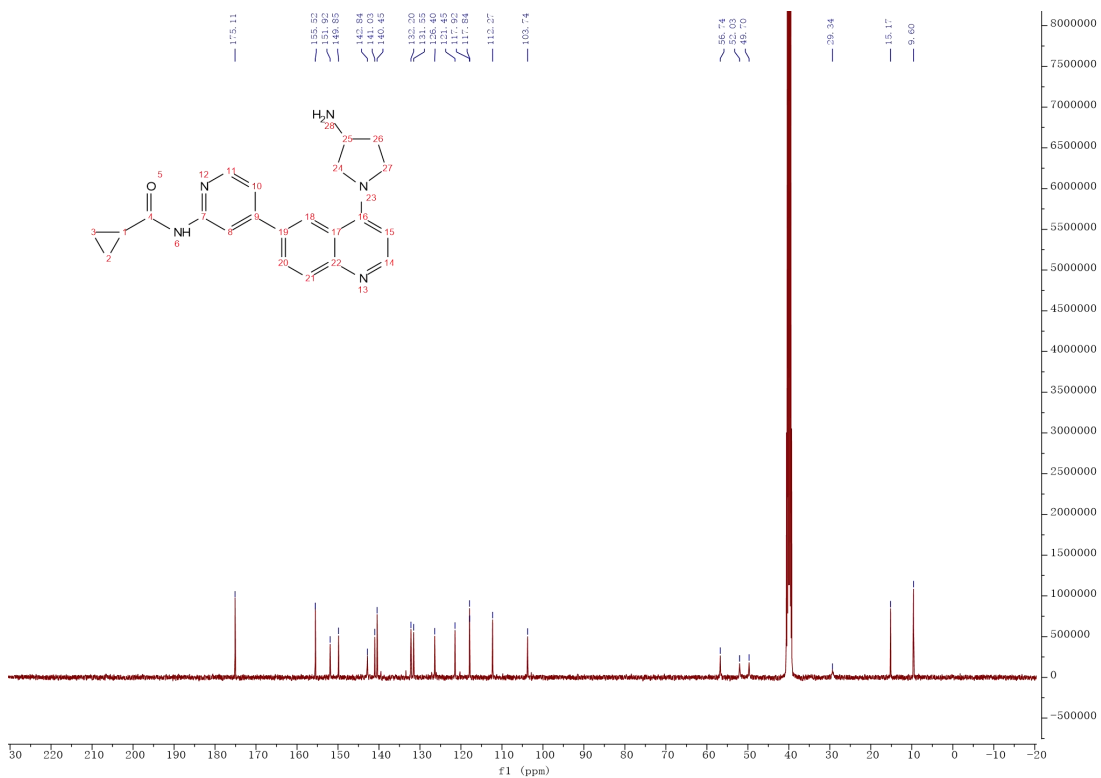

<sup>13</sup>C NMR spectrum of **5h** in DMSO-*d*<sub>6</sub>.

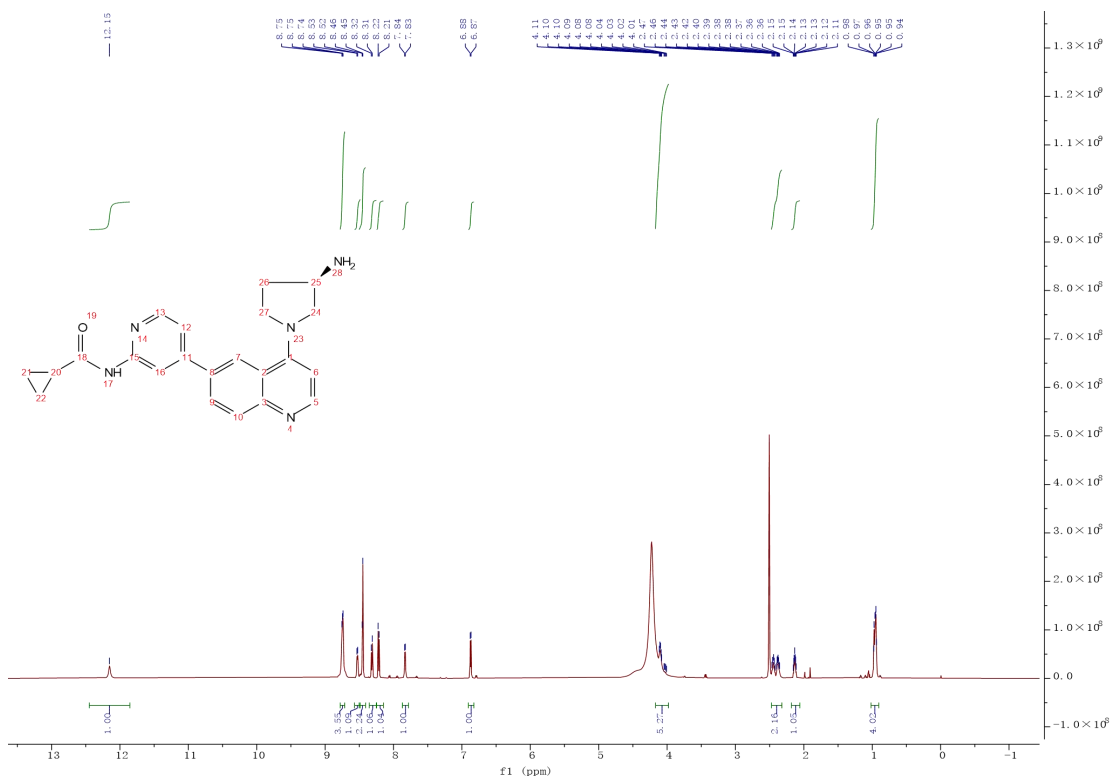

<sup>1</sup>H NMR spectrum of **5i** in DMSO-*d*<sub>6</sub>.

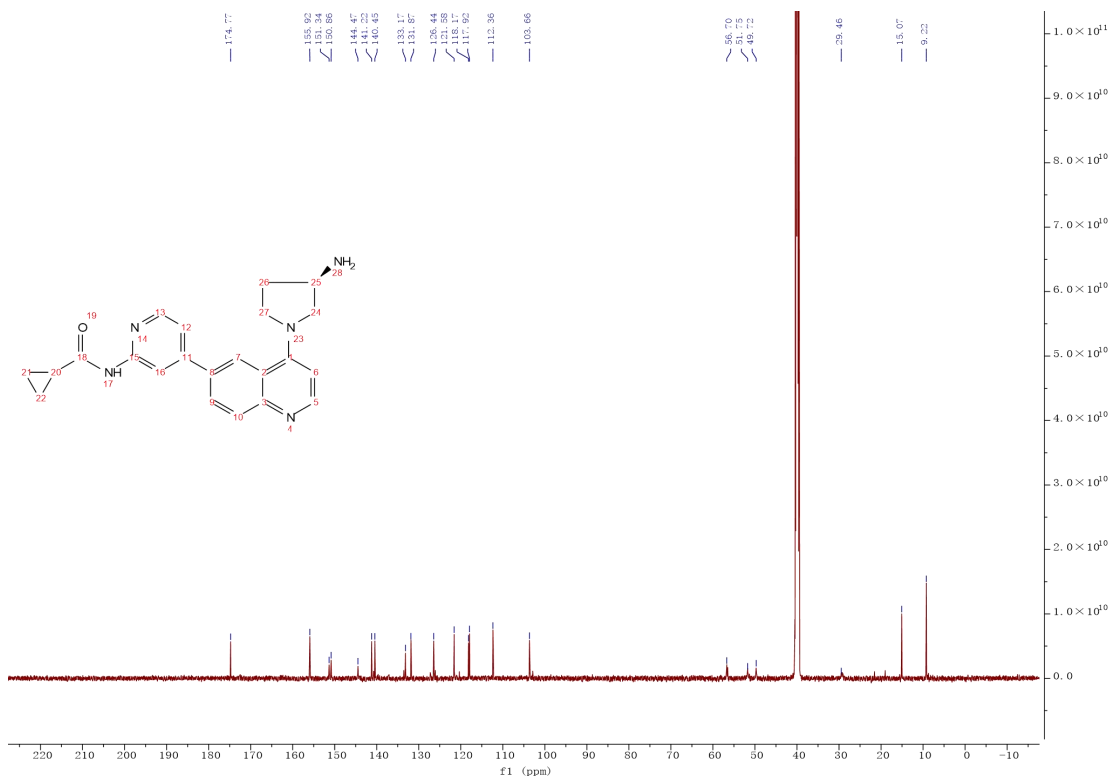

<sup>13</sup>C NMR spectrum of **5i** in DMSO-*d*<sub>6</sub>.

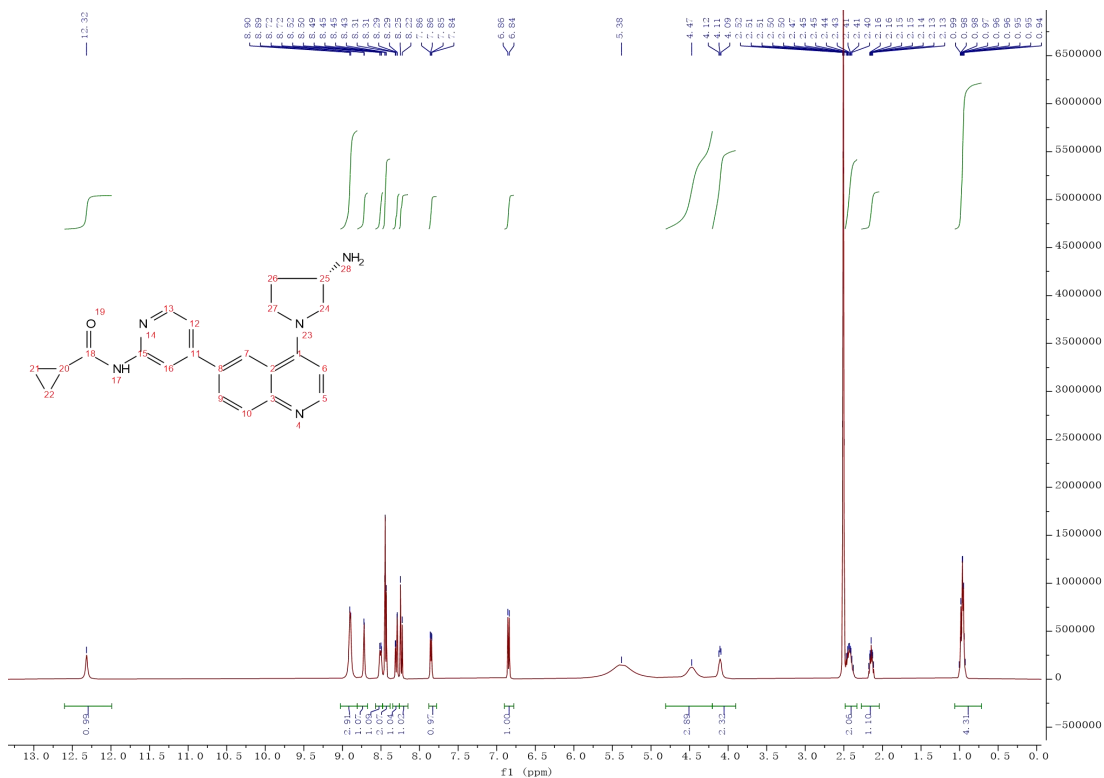

**<sup>1</sup>H NMR spectrum of **5j** in DMSO-*d*<sub>6</sub>.**

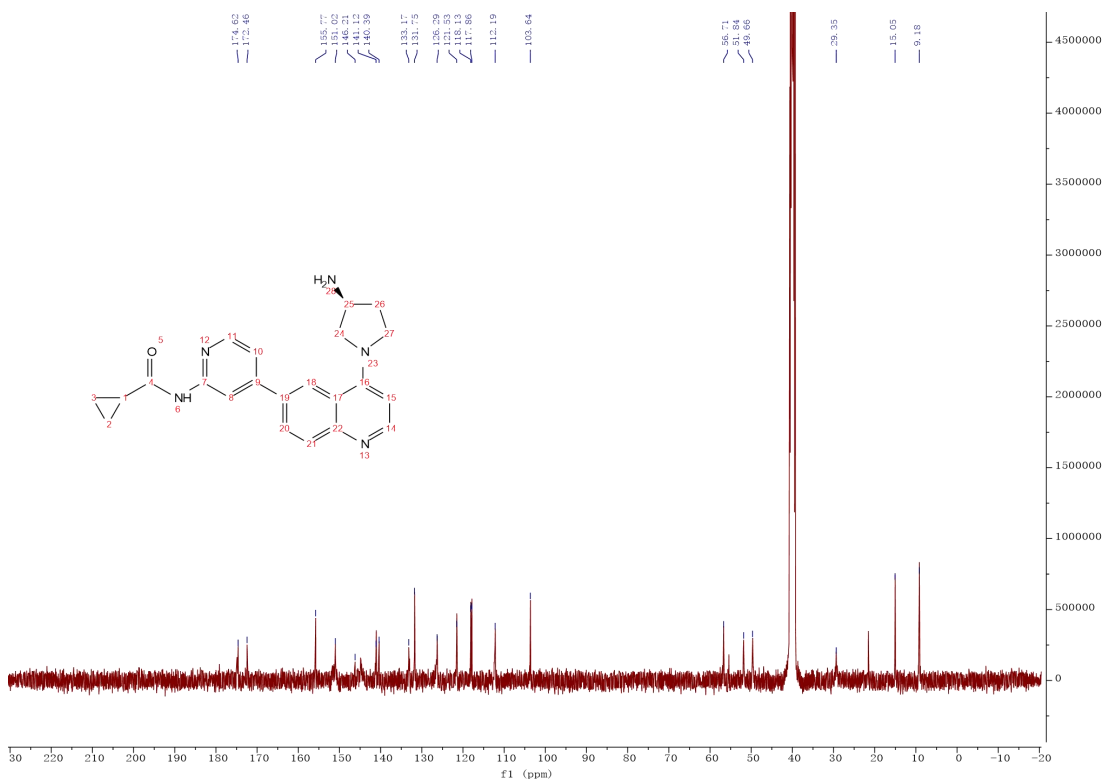

**<sup>13</sup>C NMR spectrum of **5j** in DMSO-*d*<sub>6</sub>.**

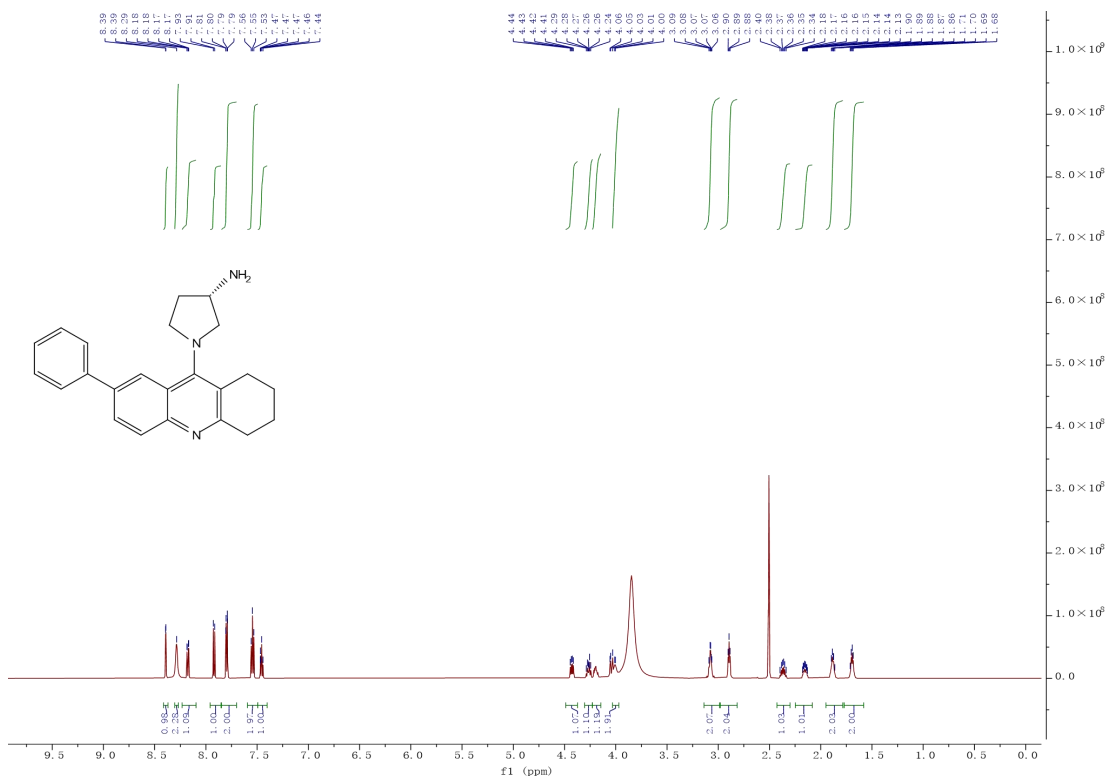

<sup>1</sup>H NMR spectrum of **5k** in DMSO-*d*<sub>6</sub>.

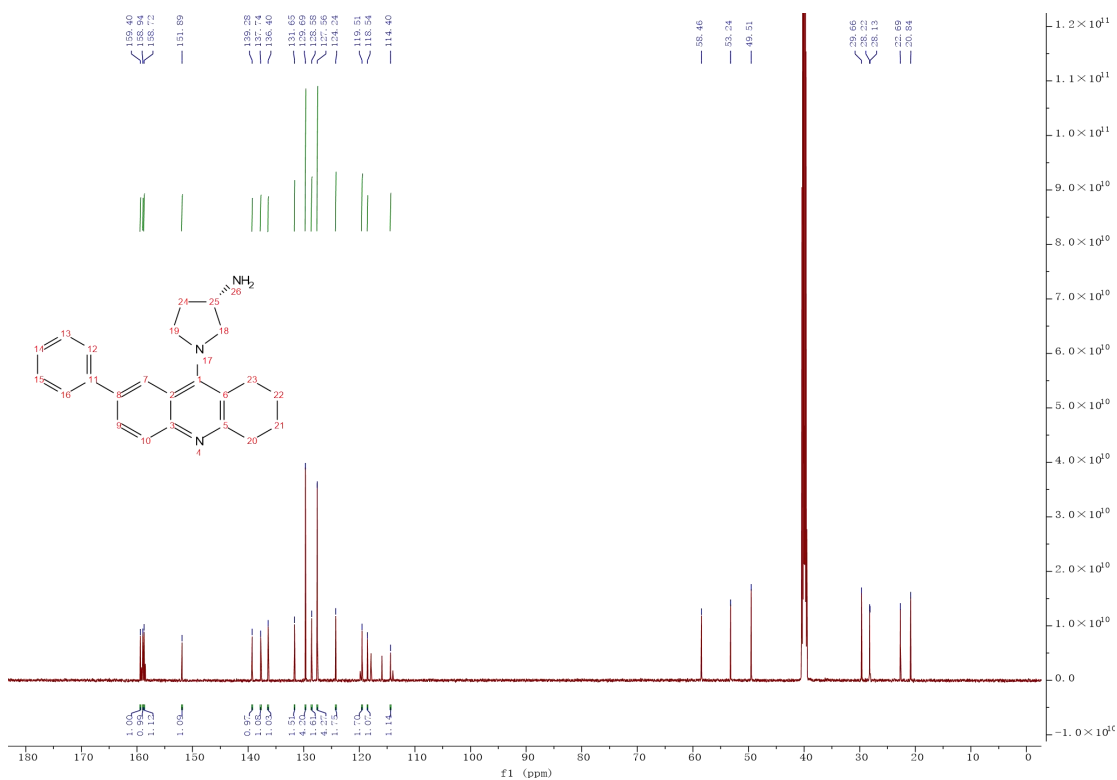

<sup>13</sup>C NMR spectrum of **5k** in DMSO-*d*<sub>6</sub>.

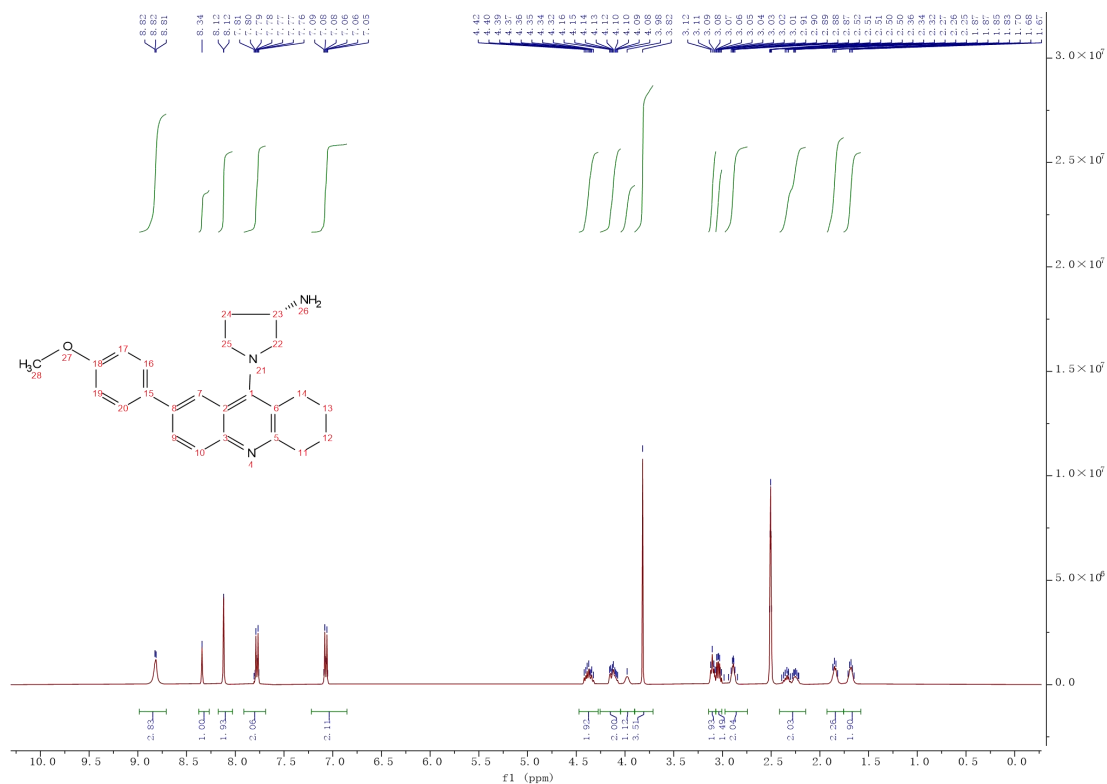

<sup>1</sup>H NMR spectrum of **51** in DMSO-*d*<sub>6</sub>.

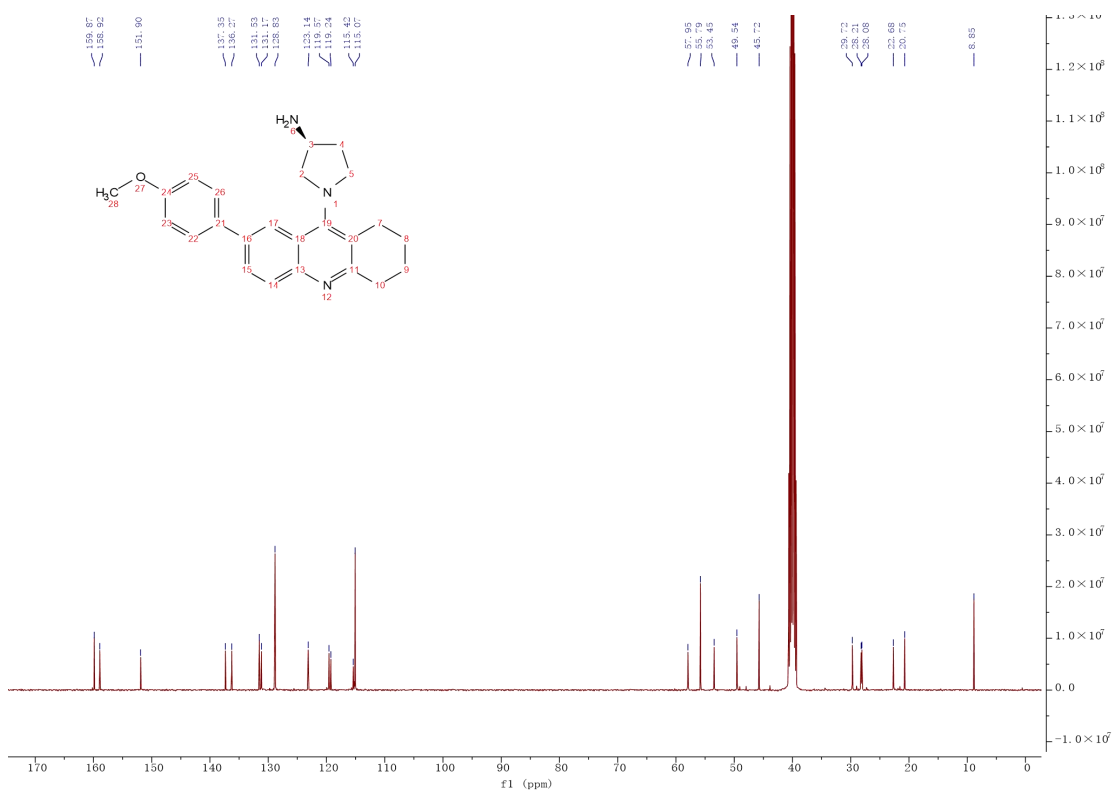

<sup>13</sup>C NMR spectrum of **51** in DMSO-*d*<sub>6</sub>.

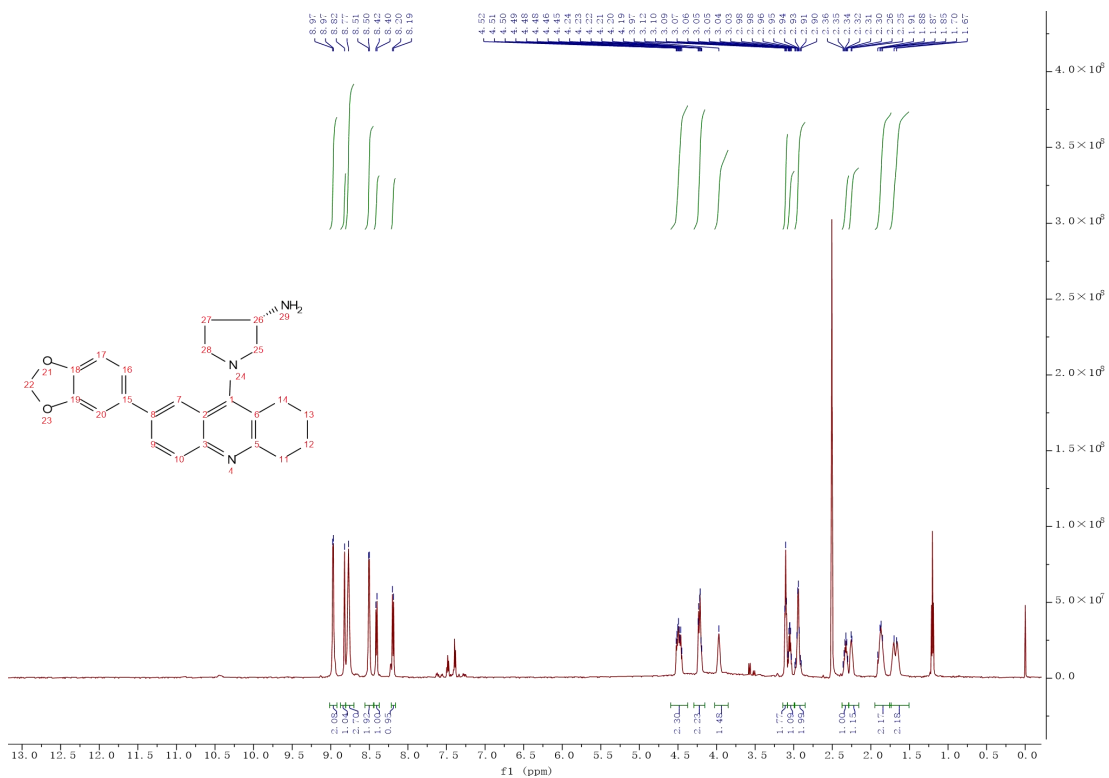

**<sup>1</sup>H NMR spectrum of 5m in DMSO-*d*<sub>6</sub>.**

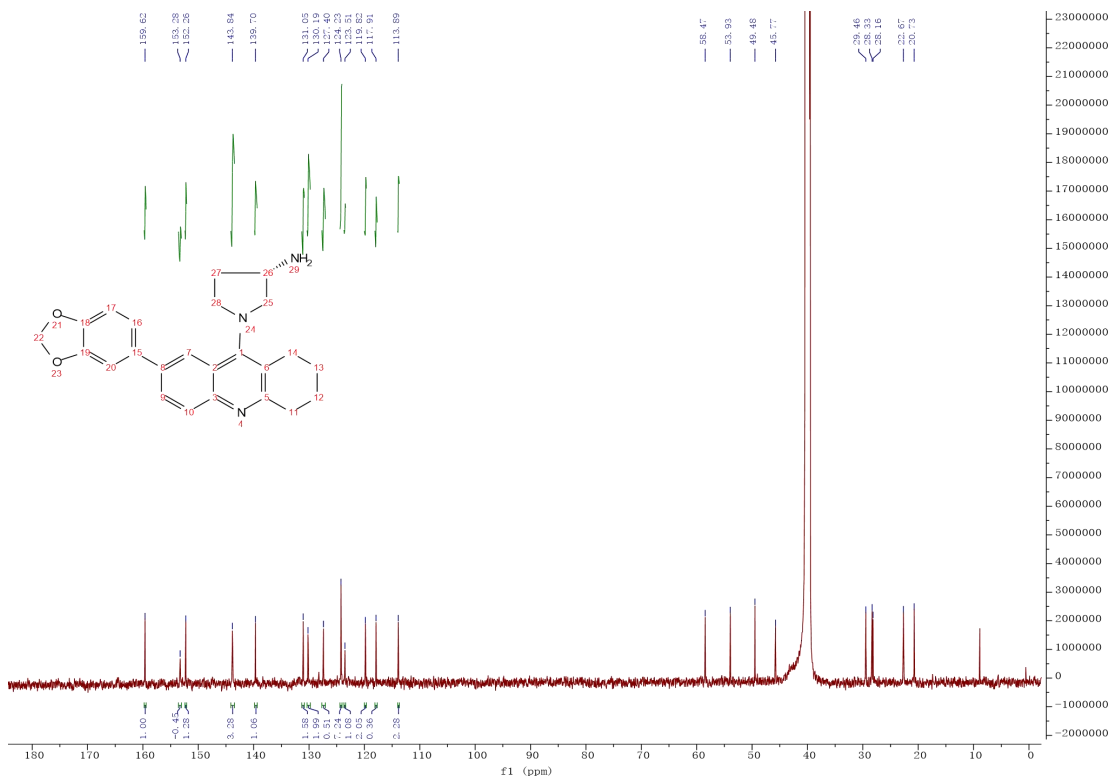

**<sup>13</sup>C NMR spectrum of 5m in DMSO-*d*<sub>6</sub>.**



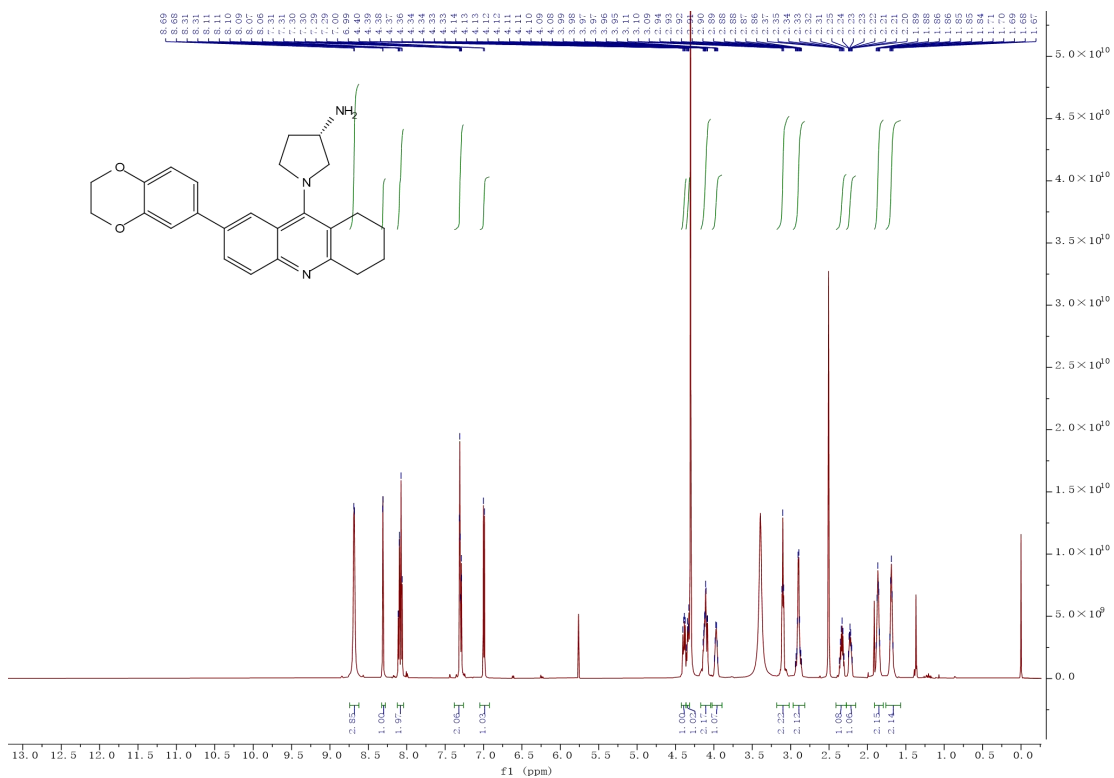

**<sup>1</sup>H NMR spectrum of **5n** in DMSO-*d*<sub>6</sub>.**

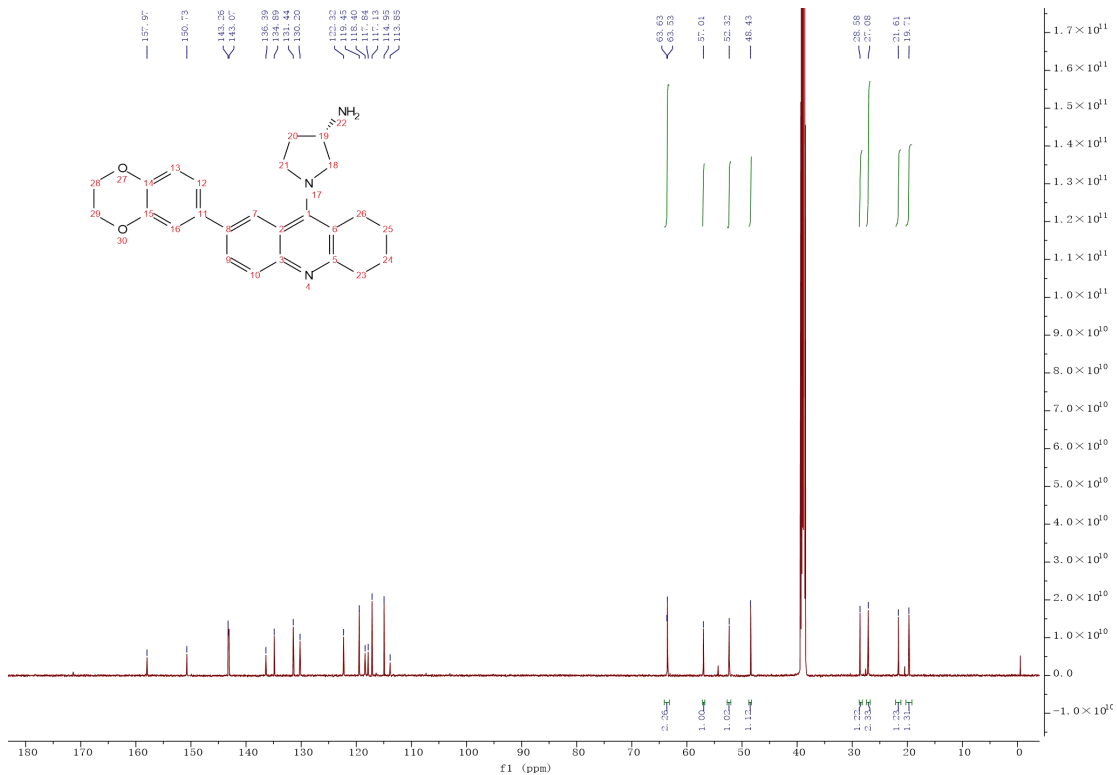

**<sup>13</sup>C NMR spectrum of **5n** in DMSO-*d*<sub>6</sub>.**

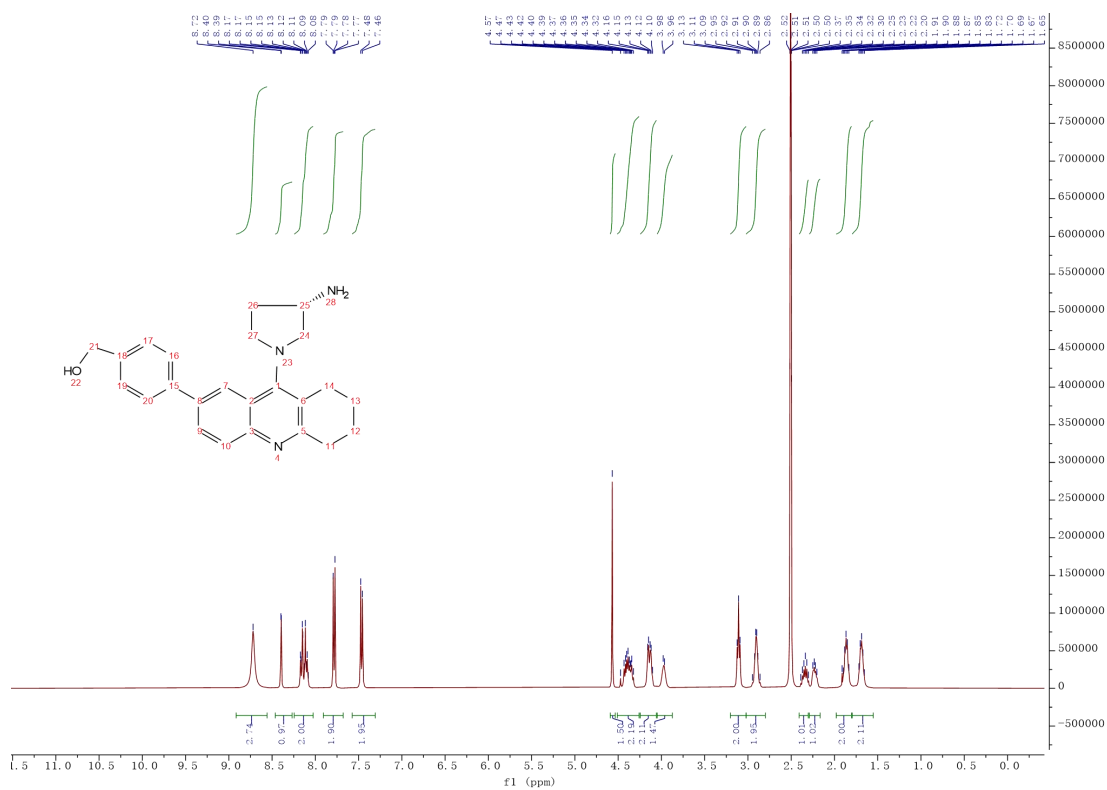

**<sup>1</sup>H NMR spectrum of 50 in DMSO-*d*<sub>6</sub>.**

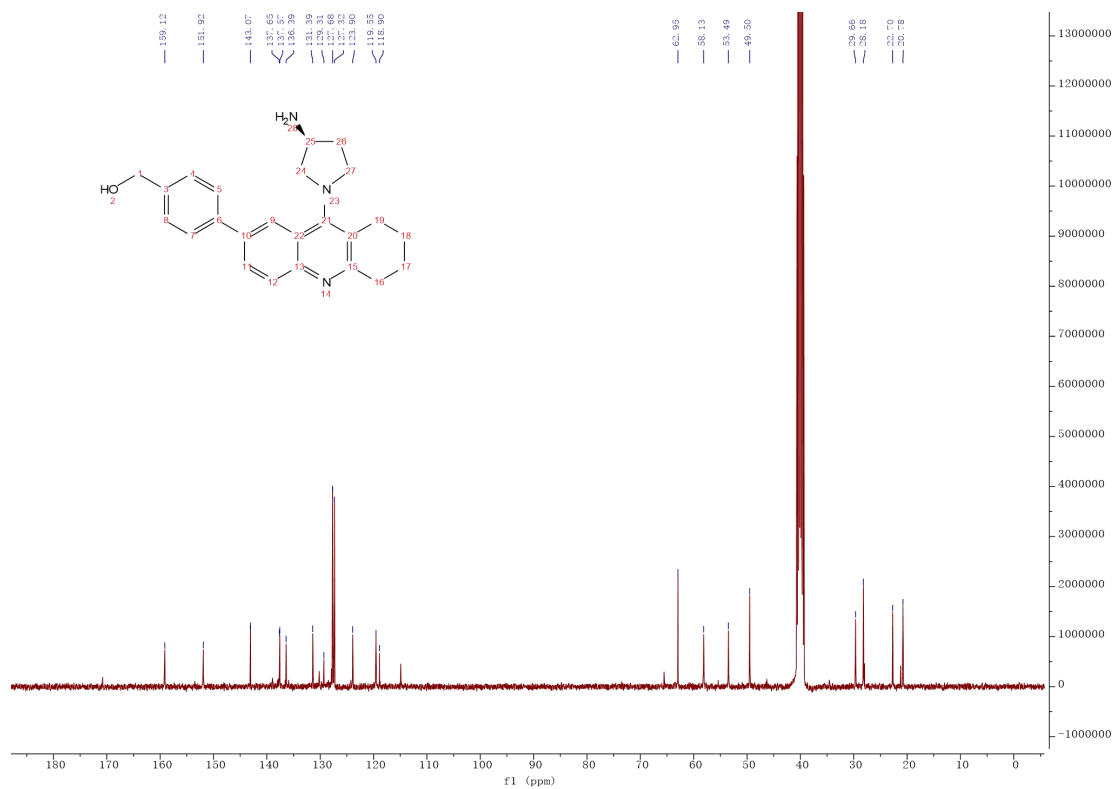

**<sup>13</sup>C NMR spectrum of 50 in DMSO-*d*<sub>6</sub>.**

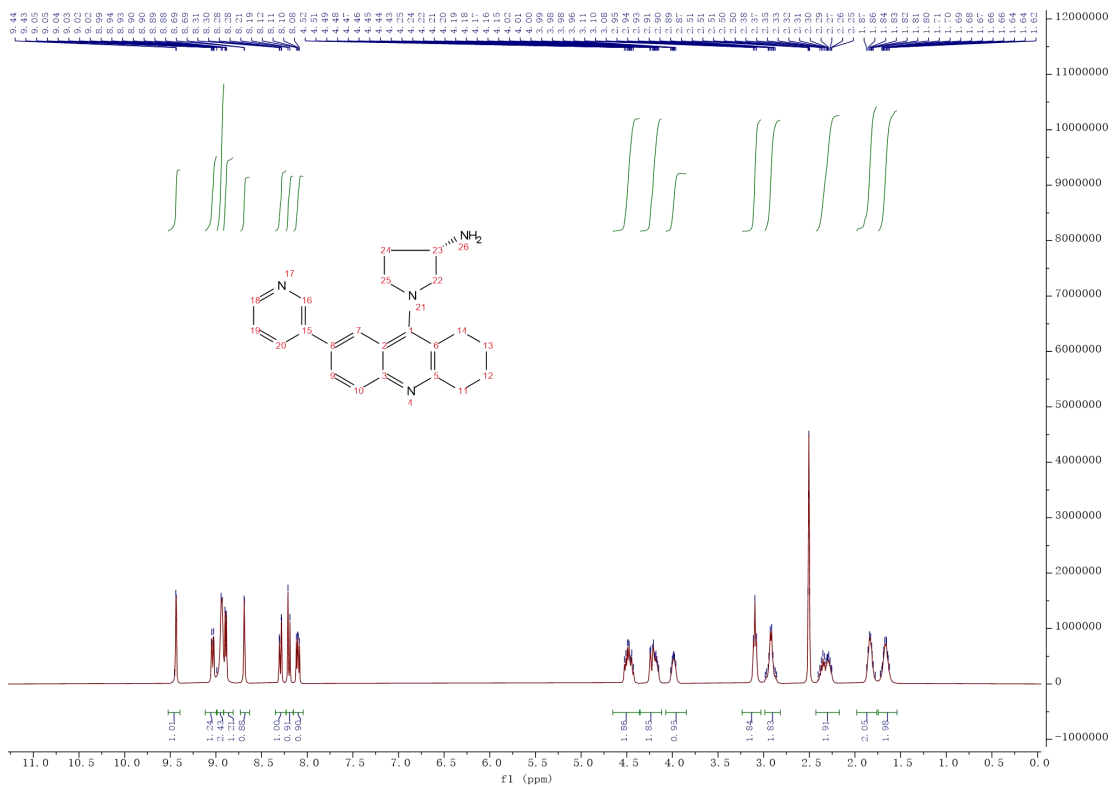

**<sup>1</sup>H NMR spectrum of 5p in DMSO-*d*<sub>6</sub>.**

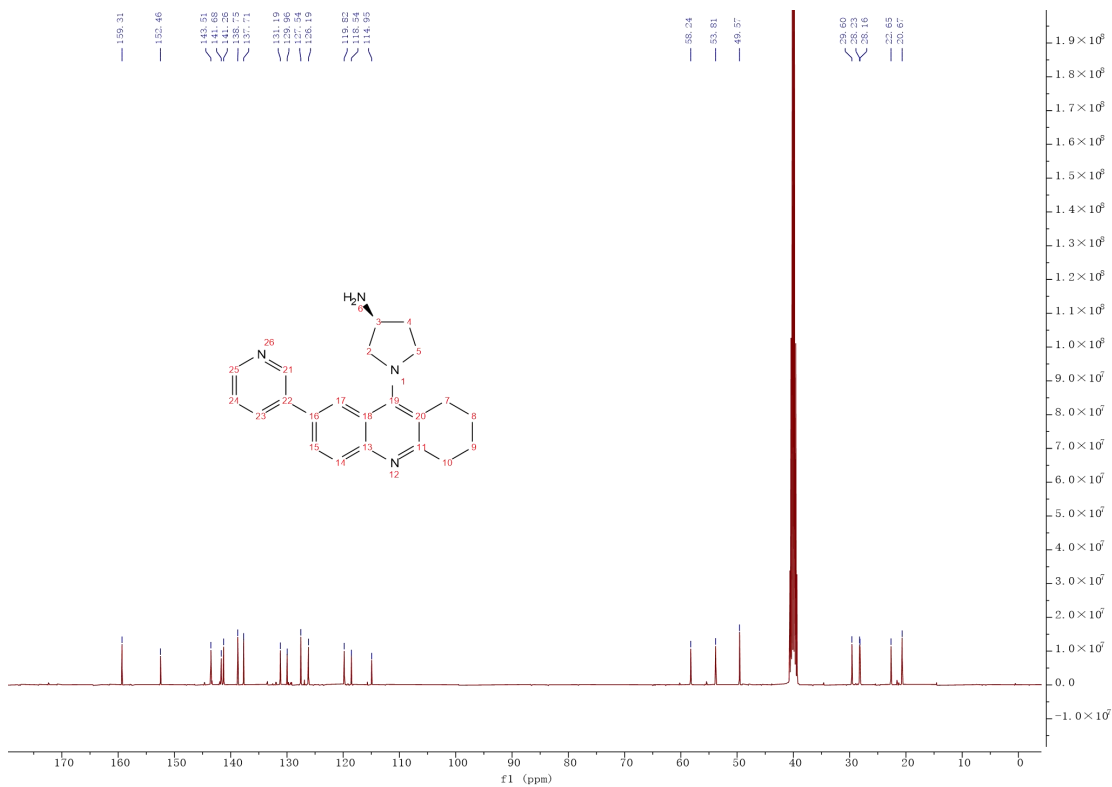

**<sup>13</sup>C NMR spectrum of 5p in DMSO-*d*<sub>6</sub>.**

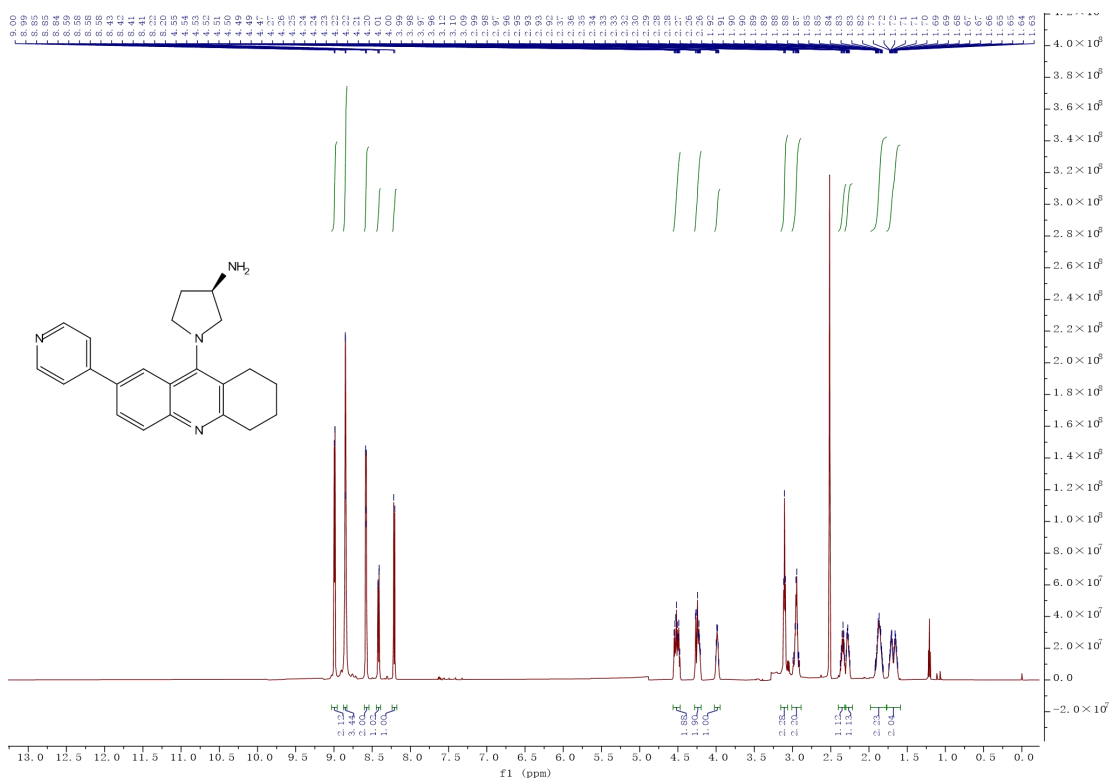

<sup>1</sup>H NMR spectrum of **5q** in DMSO-*d*<sub>6</sub>.

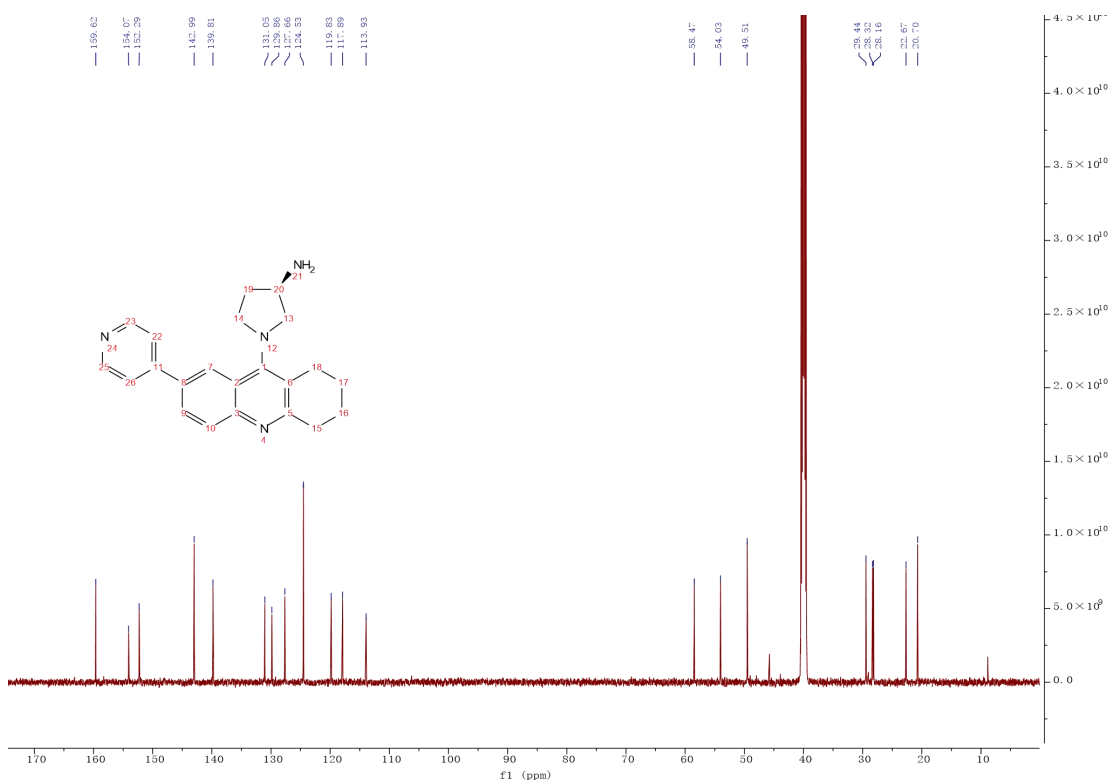

<sup>13</sup>C NMR spectrum of **5q** in DMSO-*d*<sub>6</sub>.

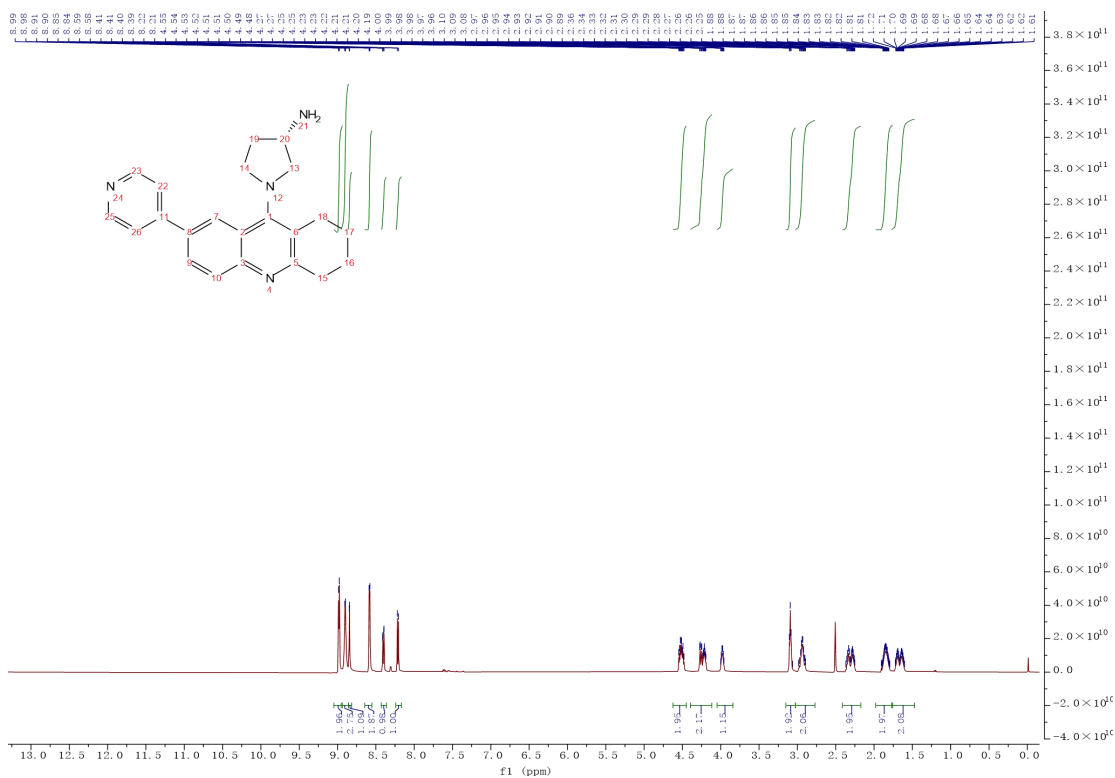

**<sup>1</sup>H NMR spectrum of 5r in DMSO-*d*<sub>6</sub>.**

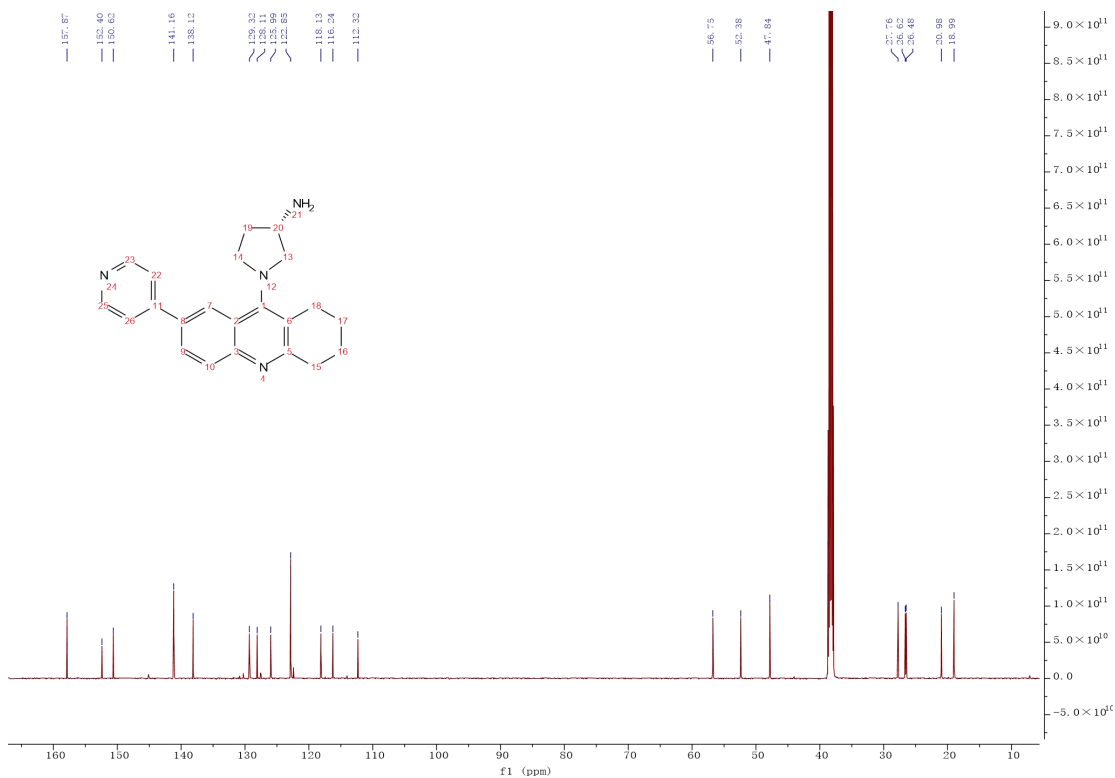

**<sup>13</sup>C NMR spectrum of 5r in DMSO-*d*<sub>6</sub>.**

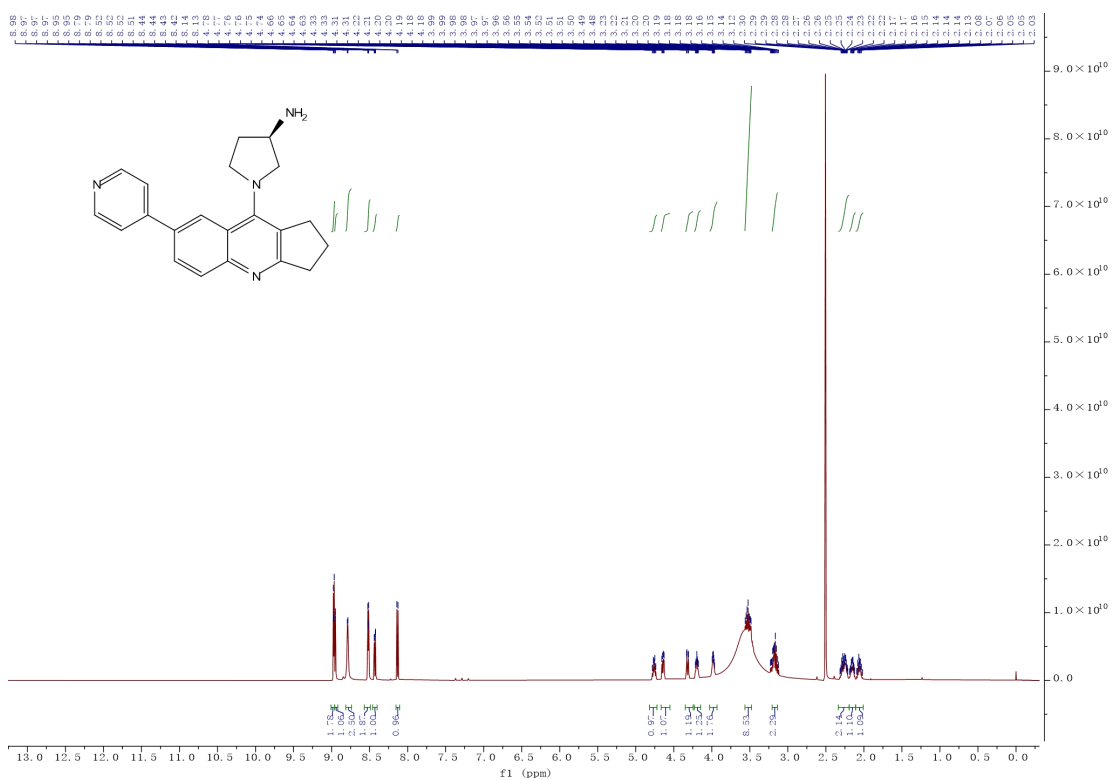

**<sup>1</sup>H NMR spectrum of 5s in DMSO-*d*<sub>6</sub>.**

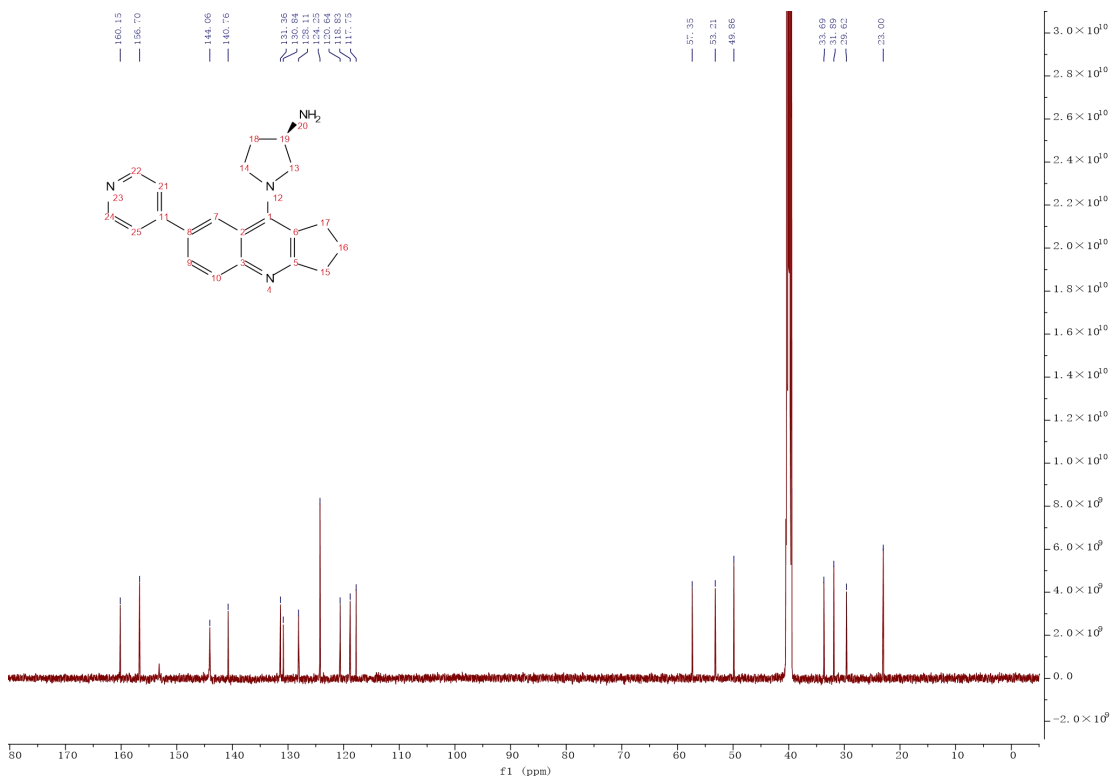

**<sup>13</sup>C NMR spectrum of 5s in DMSO-*d*<sub>6</sub>.**



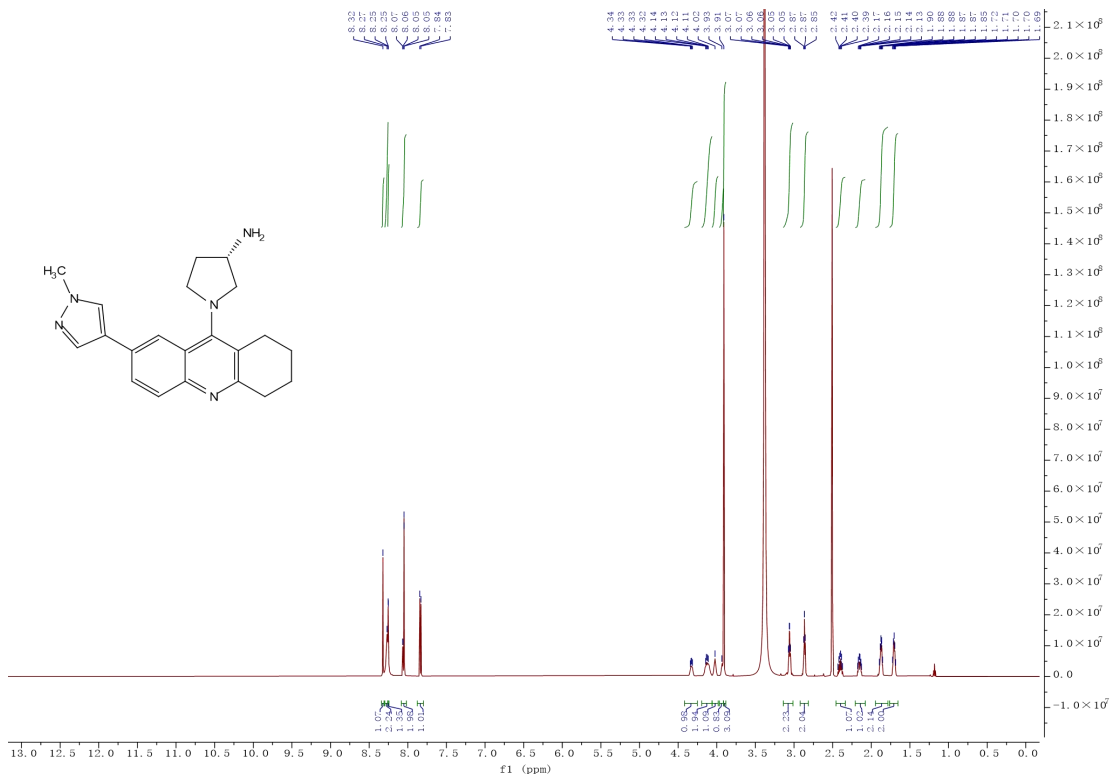

$^1\text{H}$  NMR spectrum of **5u** in  $\text{DMSO}-d_6$ .

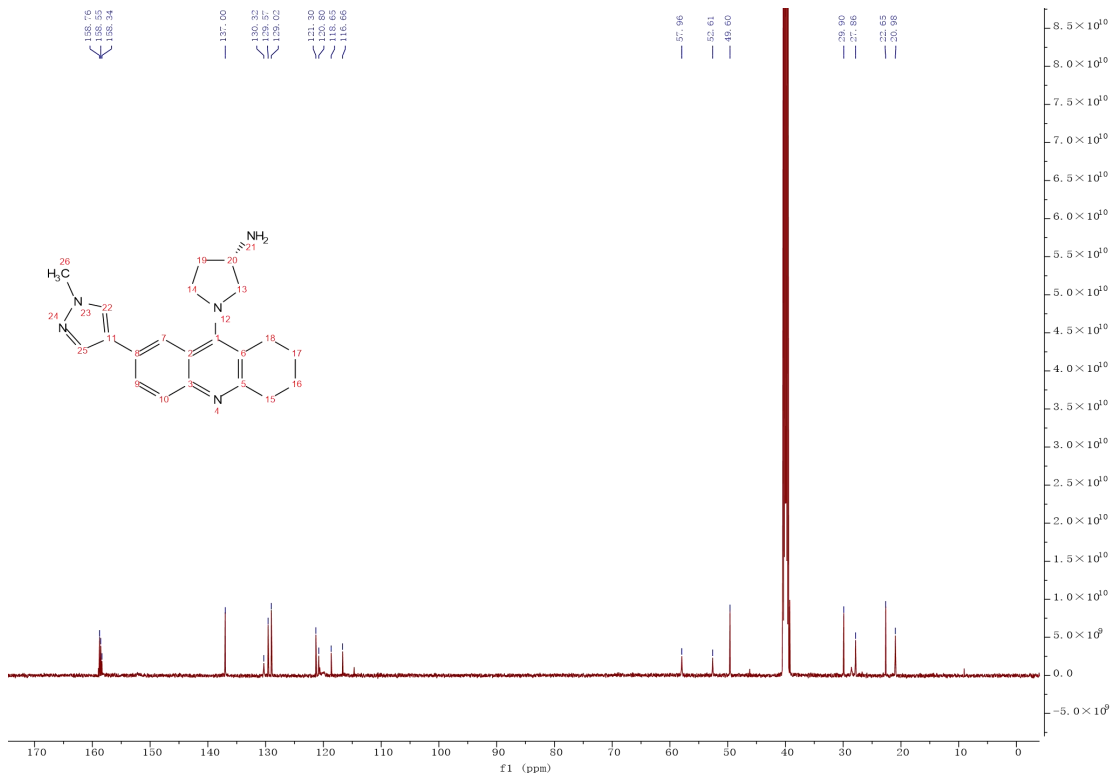

$^{13}\text{C}$  NMR spectrum of **5u** in  $\text{DMSO}-d_6$ .



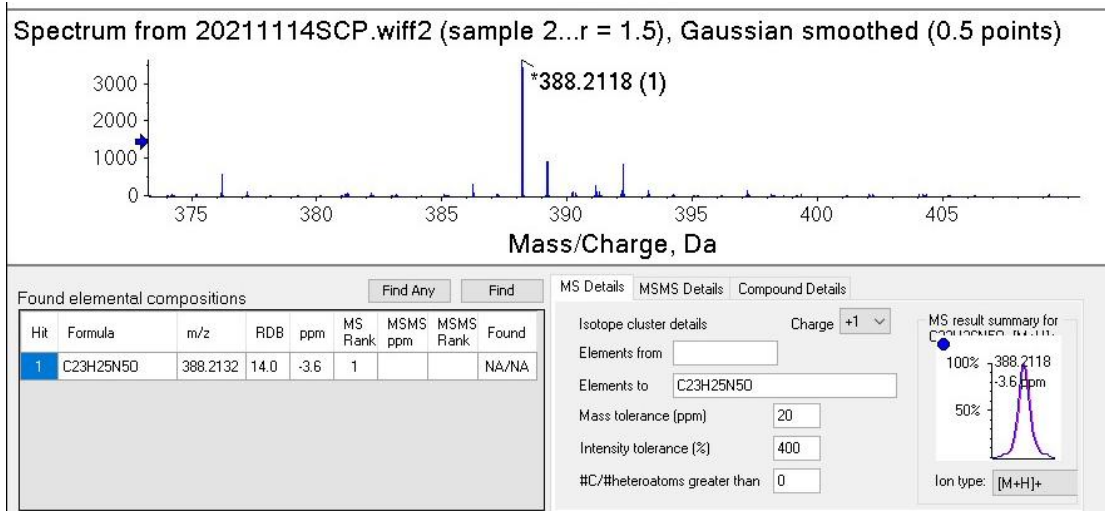

HR-ESI-MS of compound **5a**: 388.2118 [M+H]<sup>+</sup>, (calcd for C<sub>23</sub>H<sub>25</sub>N<sub>5</sub>O, 388.2132).

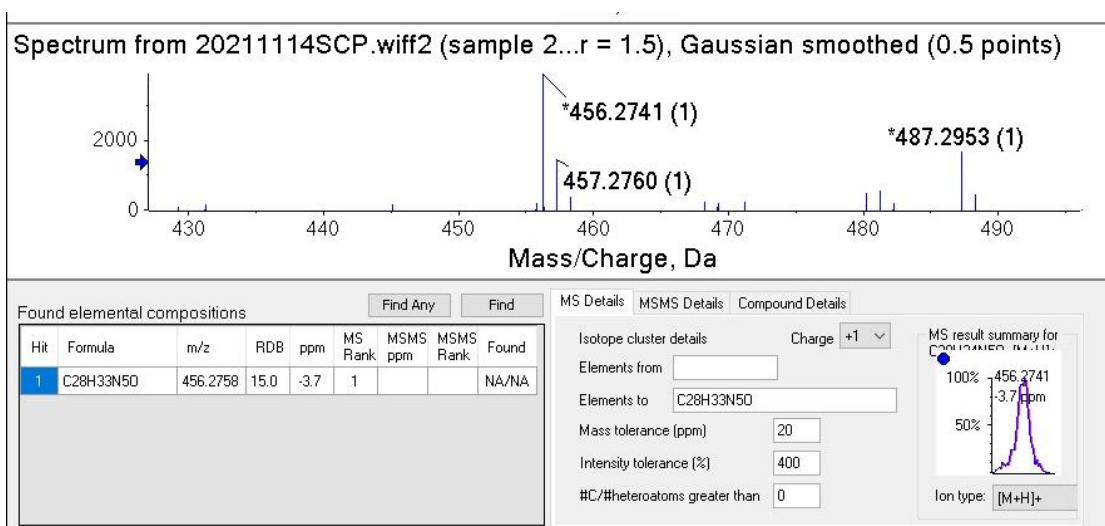

HR-ESI-MS of compound **5b**: 456.2741 [M+H]<sup>+</sup>, (calcd for C<sub>28</sub>H<sub>33</sub>N<sub>5</sub>O, 456.2758).

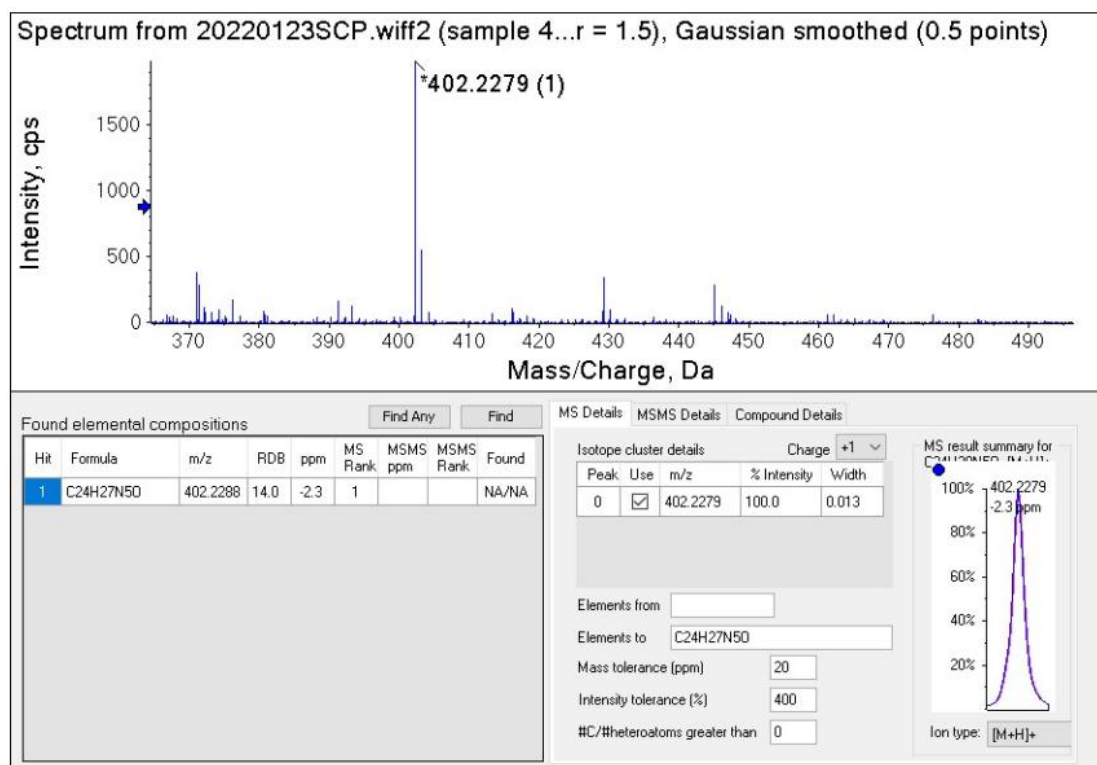

HR-ESI-MS of compound **5c**: 402.2279 [M+H]<sup>+</sup>, (calcd for C<sub>24</sub>H<sub>27</sub>N<sub>5</sub>O, 402.2288).

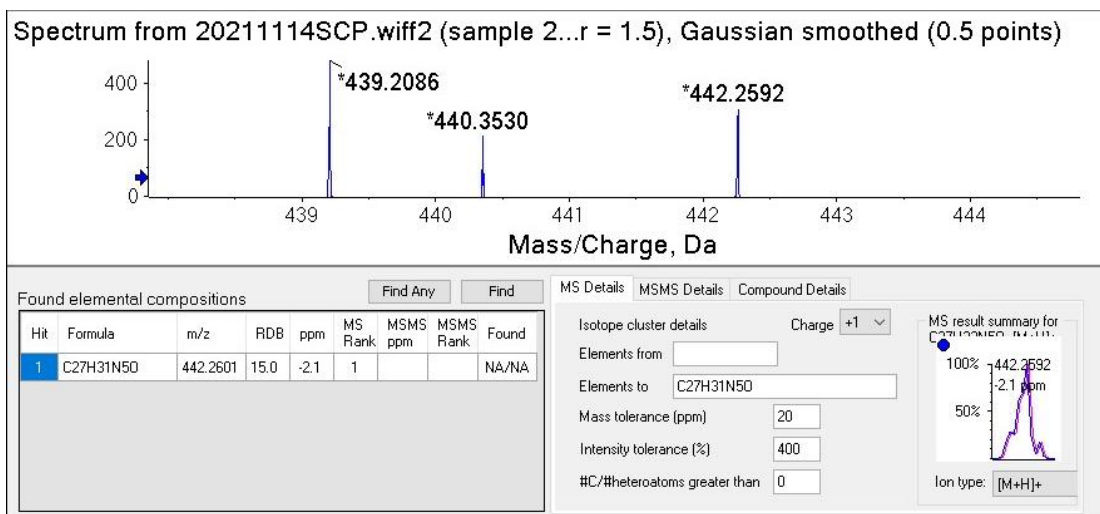

HR-ESI-MS of compound **5d**: 442.2592 [M+H]<sup>+</sup>, (calcd for C<sub>27</sub>H<sub>31</sub>N<sub>5</sub>O, 442.2601).

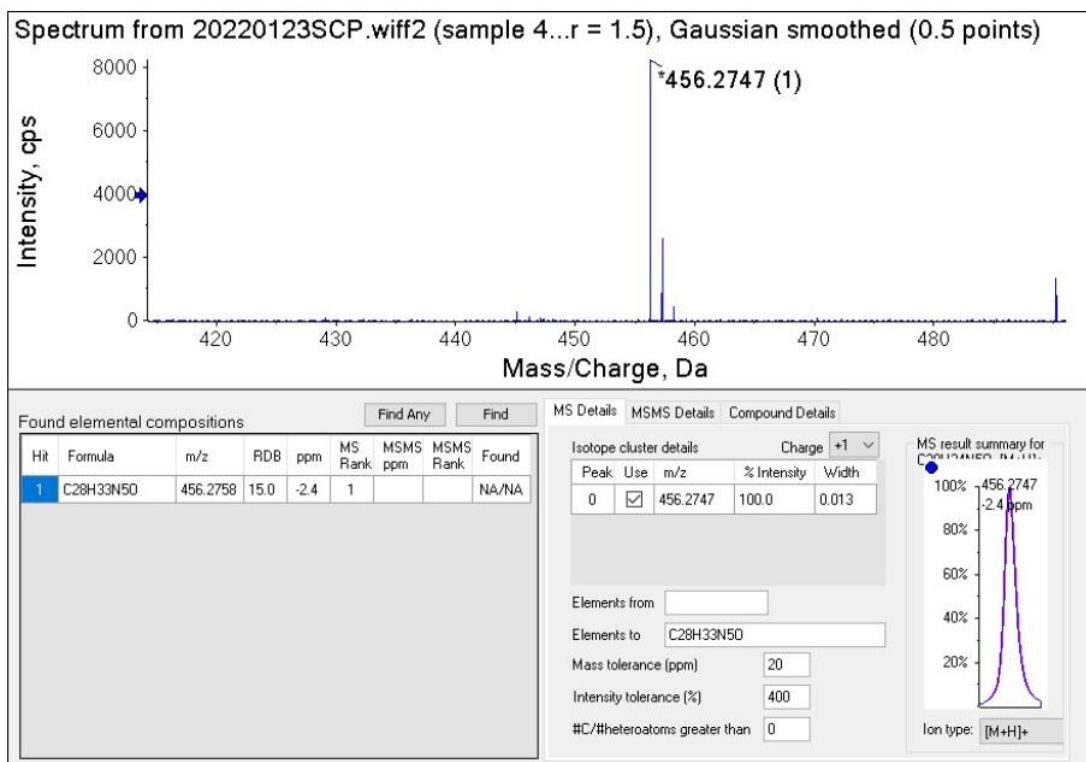

HR-ESI-MS of compound **5e**: 456.2747 [M+H]<sup>+</sup>, (calcd for C<sub>28</sub>H<sub>33</sub>N<sub>5</sub>O, 456.2758).

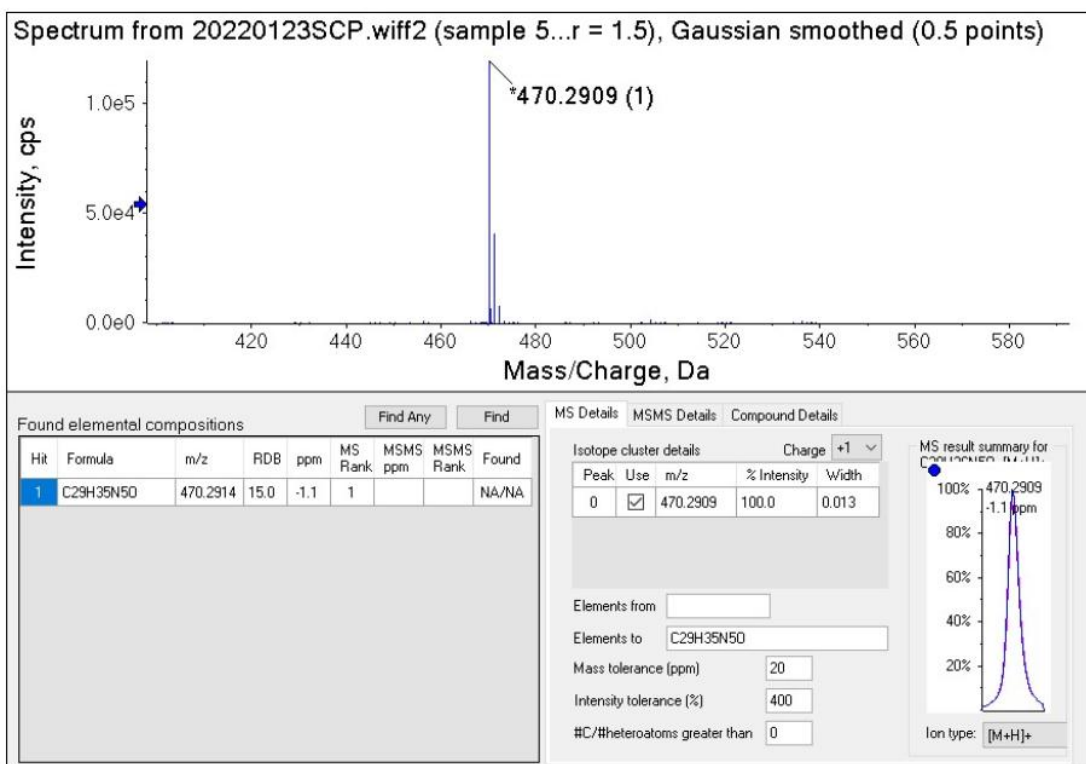

HR-ESI-MS of compound **5f**: 470.2909 [M+H]<sup>+</sup>, (calcd for C<sub>29</sub>H<sub>35</sub>N<sub>5</sub>O, 470.2914).

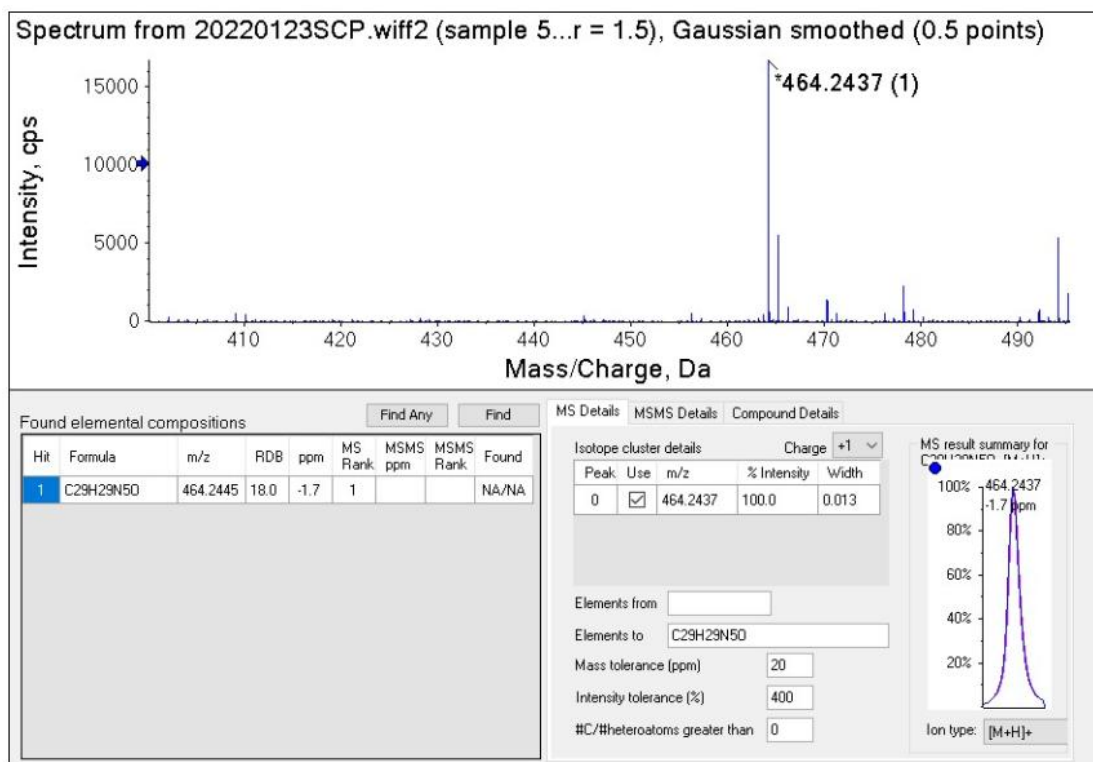

HR-ESI-MS of compound **5g**: 464.2437 [M+H]<sup>+</sup>, (calcd for C<sub>29</sub>H<sub>29</sub>N<sub>5</sub>O, 464.2445).

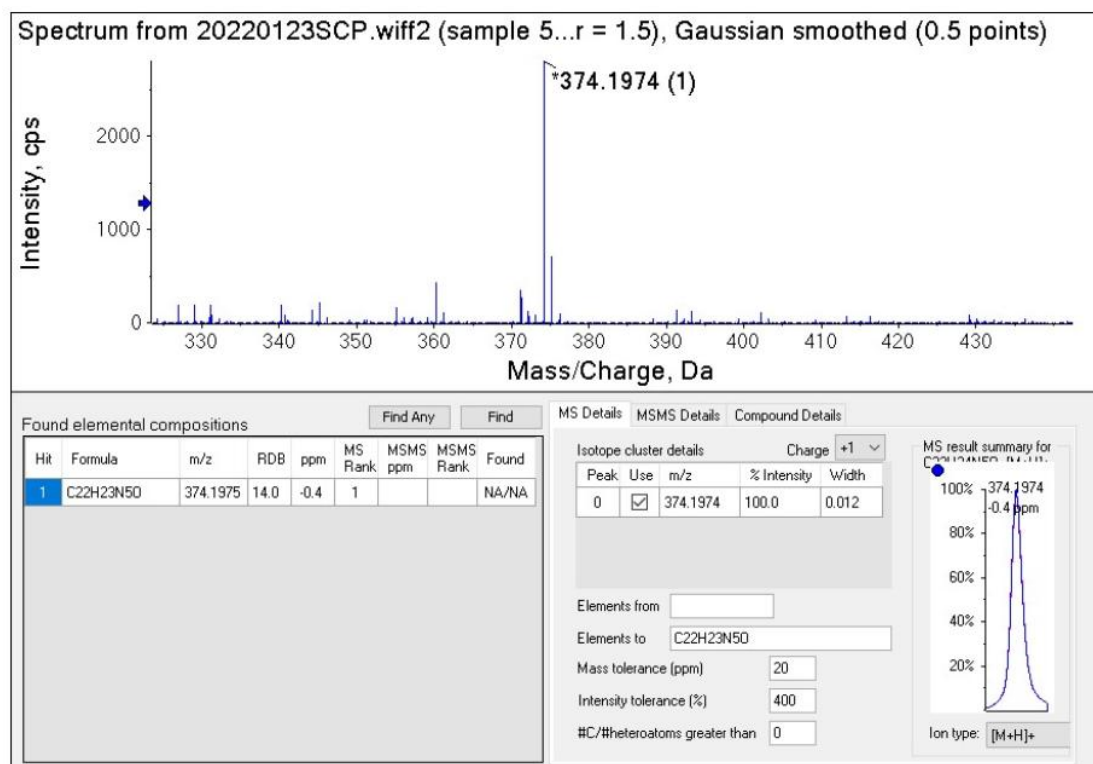

HR-ESI-MS of compound **5h**: 374.1974 [M+H]<sup>+</sup>, (calcd for C<sub>22</sub>H<sub>23</sub>N<sub>5</sub>O, 374.1975).

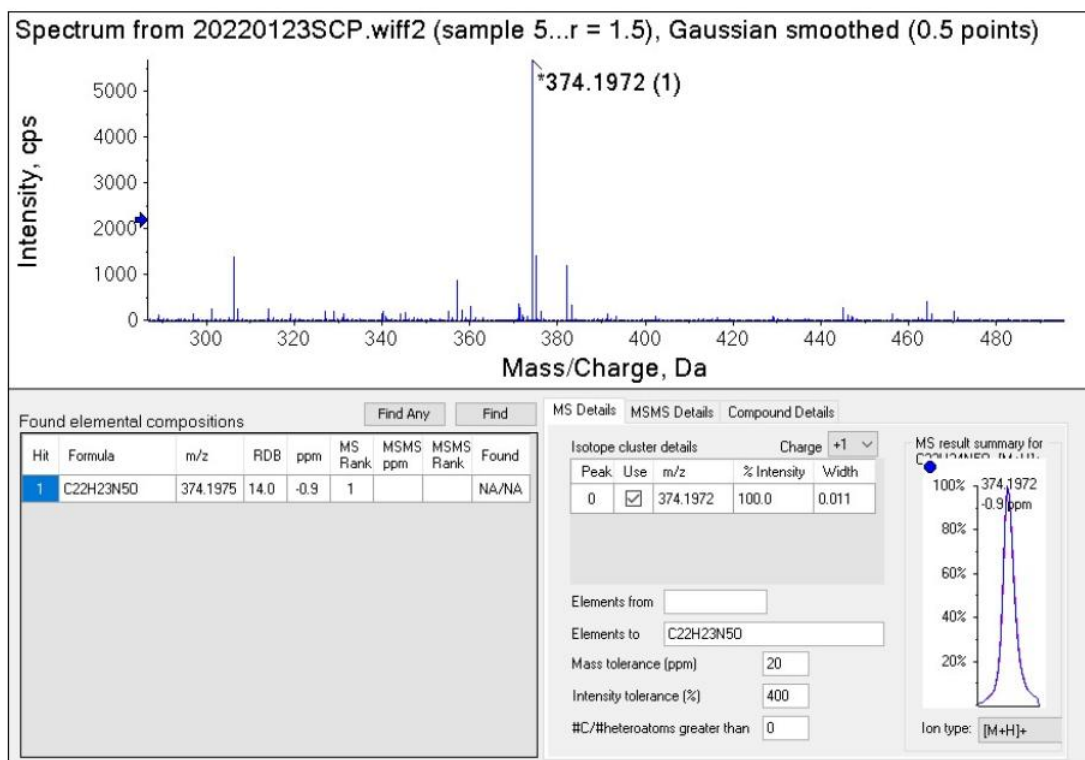

HR-ESI-MS of compound **5i**: 374.1972 [M+H]<sup>+</sup>, (calcd for C<sub>22</sub>H<sub>23</sub>N<sub>5</sub>O, 374.1975).

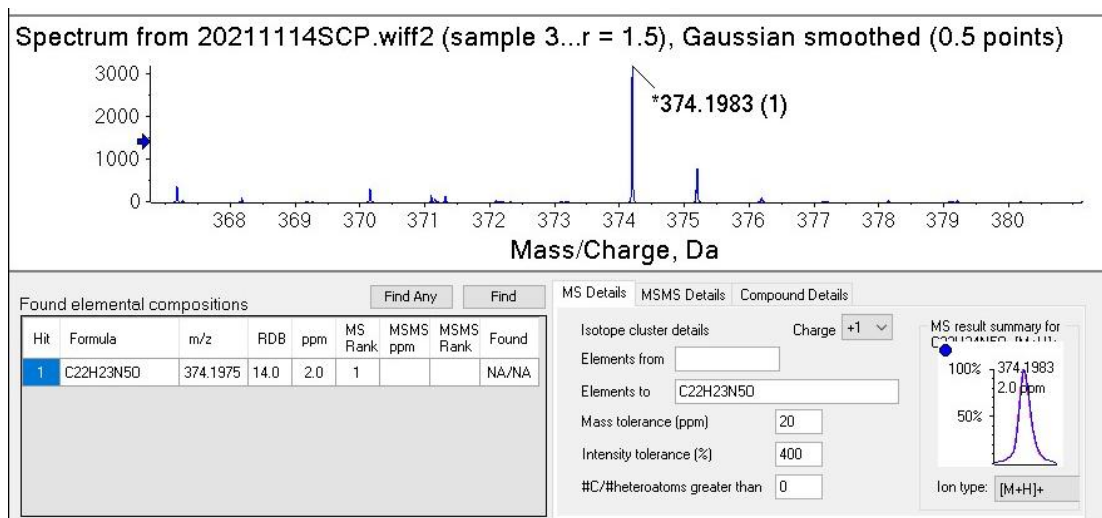

HR-ESI-MS of compound **5j**: 374.1983 [M+H]<sup>+</sup>, (calcd for C<sub>22</sub>H<sub>23</sub>N<sub>5</sub>O, 374.1975).

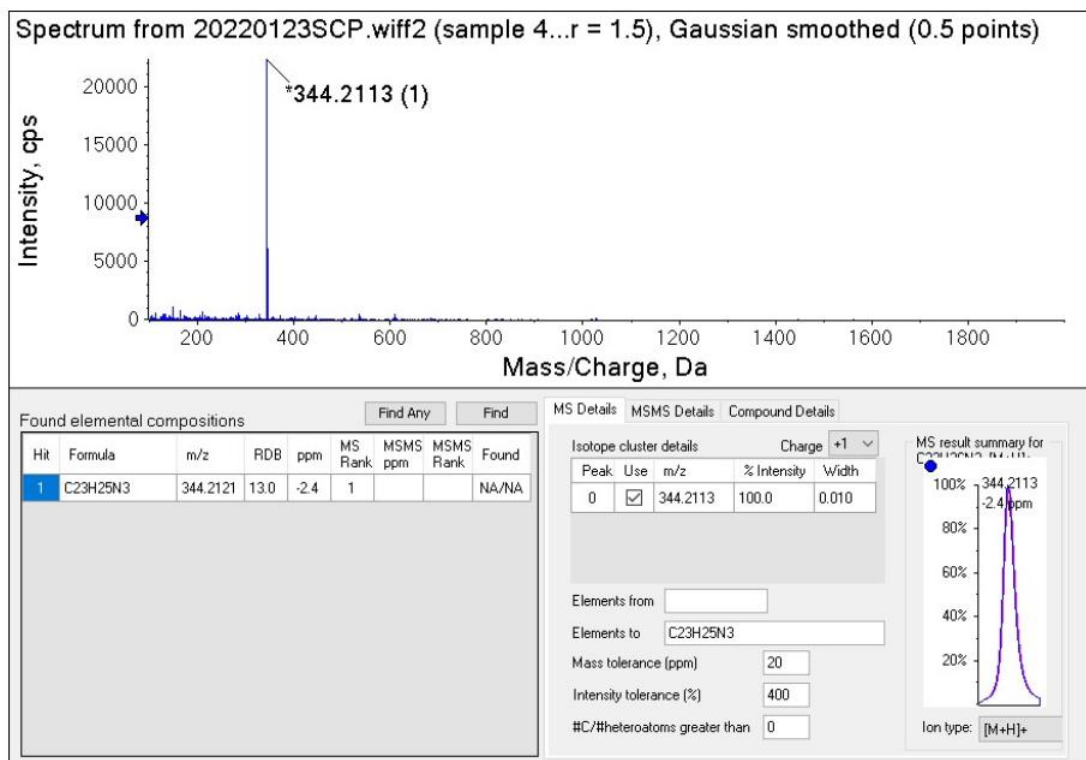

HR-ESI-MS of compound **5k**: 344.2113 [M+H]<sup>+</sup>, (calcd for C<sub>23</sub>H<sub>25</sub>N<sub>3</sub>, 344.2121).

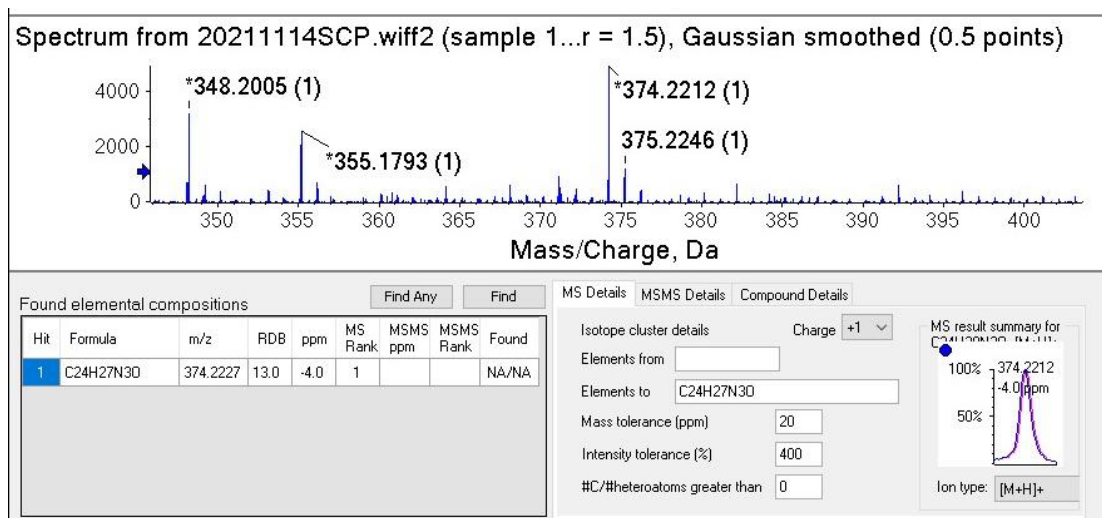

HR-ESI-MS of compound **5l**: 374.2212 [M+H]<sup>+</sup>, (calcd for C<sub>24</sub>H<sub>27</sub>N<sub>3</sub>O, 374.2227).



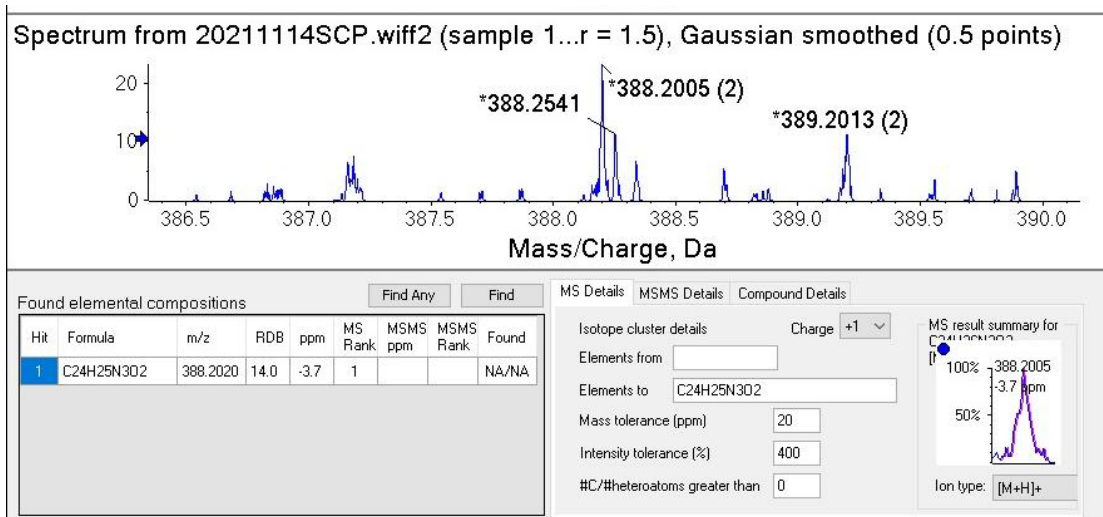

HR-ESI-MS of compound **5m**: 388.2005 [M+H]<sup>+</sup>, (calcd for C<sub>24</sub>H<sub>25</sub>N<sub>3</sub>O<sub>2</sub>, 388.2020).

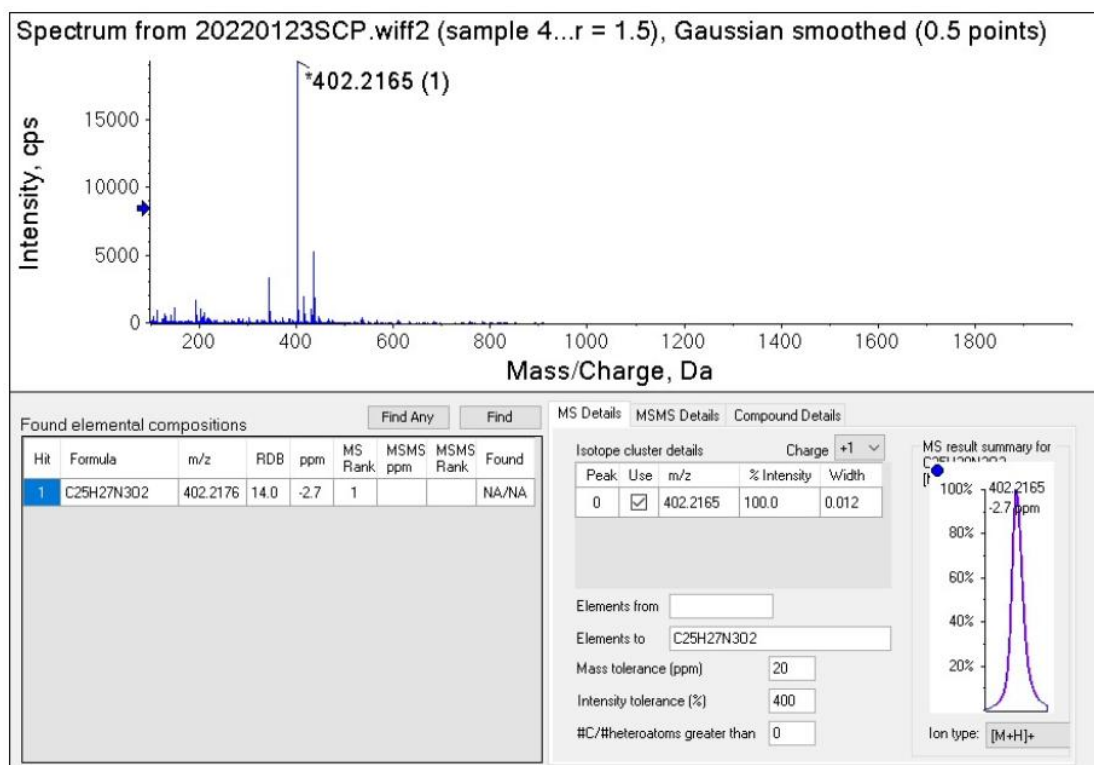

HR-ESI-MS of compound **5n**: 402.2165 [M+H]<sup>+</sup>, (calcd for C<sub>25</sub>H<sub>27</sub>N<sub>3</sub>O<sub>2</sub>, 402.2176).

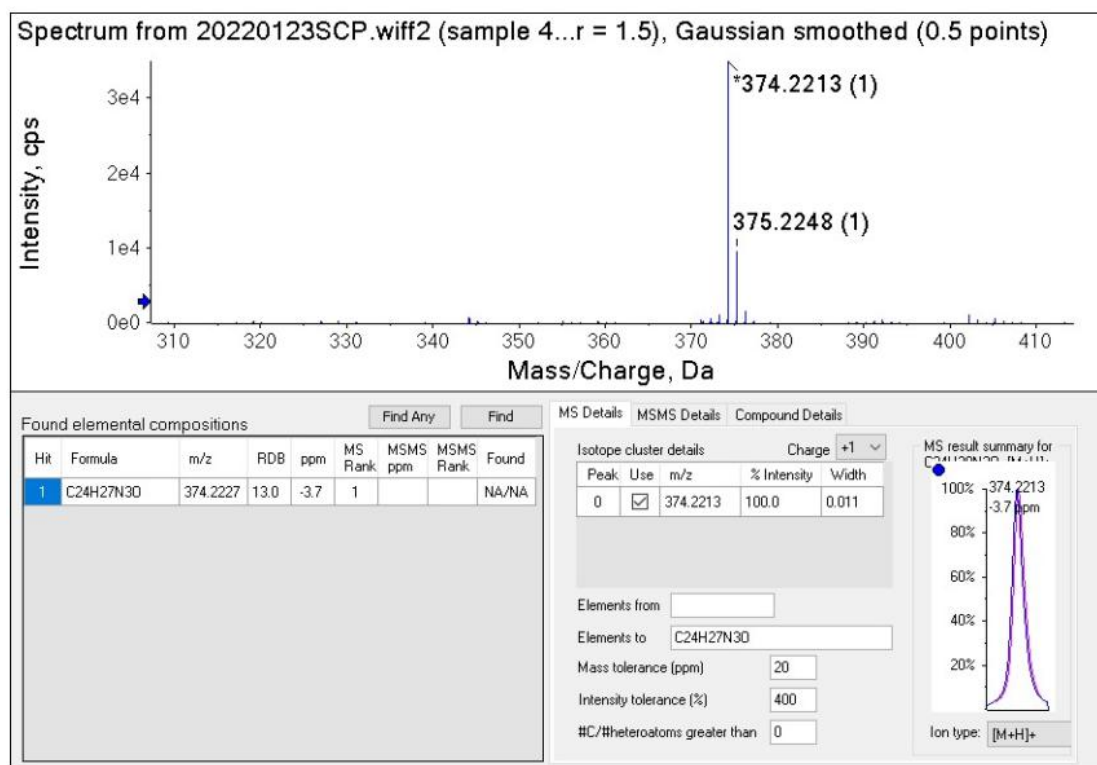

HR-ESI-MS of compound **5o**: 374.2213 [M+H]<sup>+</sup>, (calcd for C<sub>24</sub>H<sub>27</sub>N<sub>3</sub>O, 374.2227).

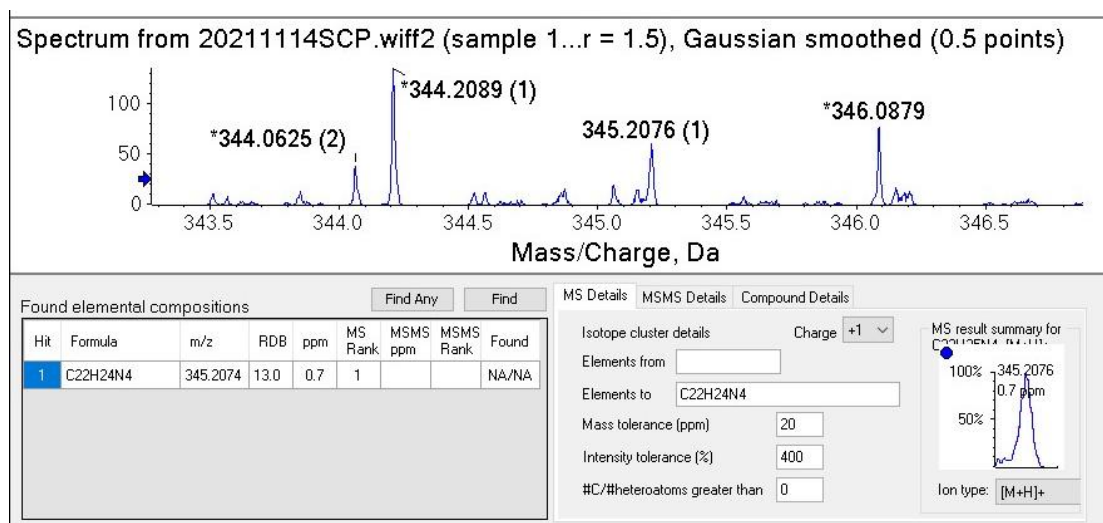

HR-ESI-MS of compound **5p**: 345.2076 [M+H]<sup>+</sup>, (calcd for C<sub>22</sub>H<sub>24</sub>N<sub>4</sub>, 345.2074).



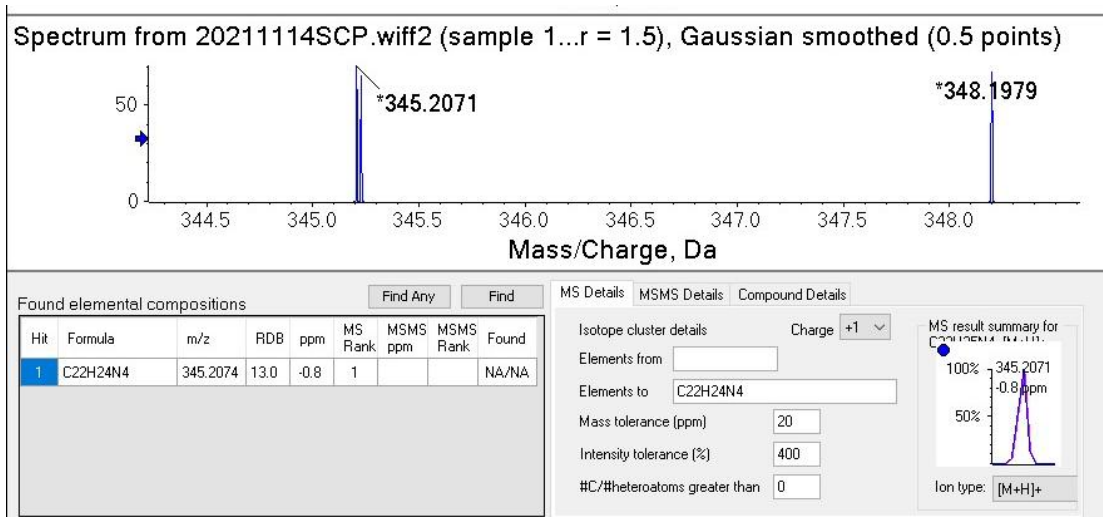

HR-ESI-MS of compound **5q**: 345.2071 [M+H]<sup>+</sup>, (calcd for C<sub>22</sub>H<sub>24</sub>N<sub>4</sub>, 345.2074).

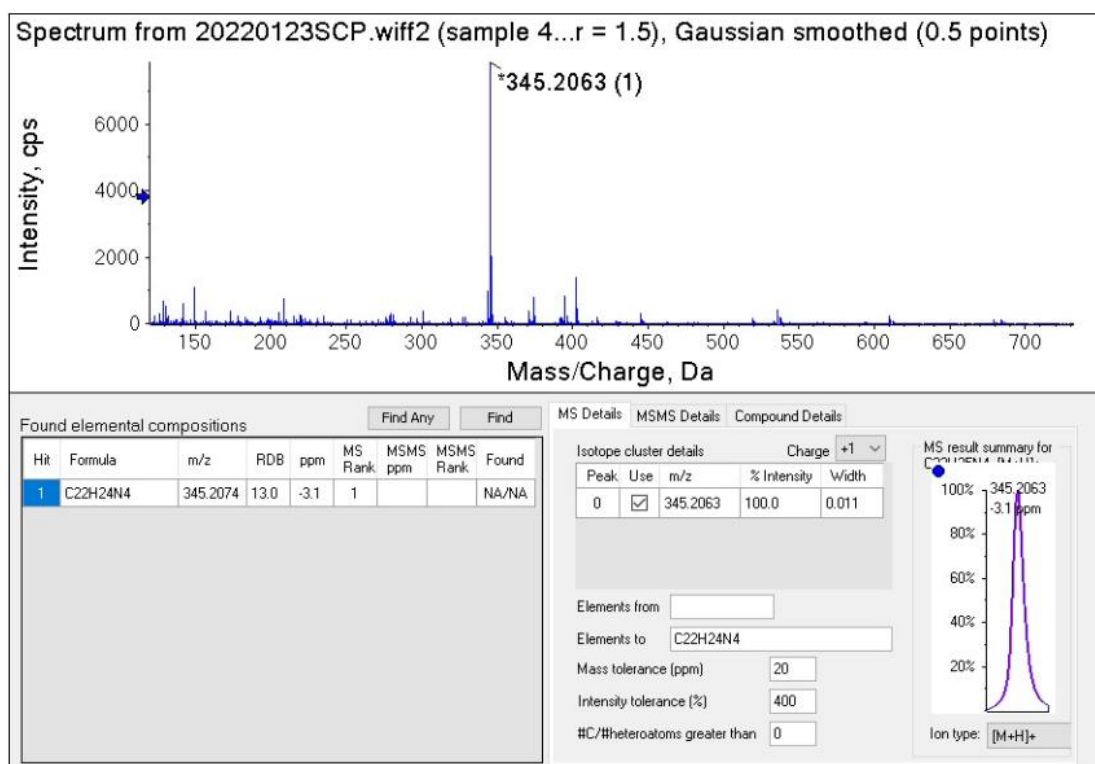

HR-ESI-MS of compound **5r**: 345.2063 [M+H]<sup>+</sup>, (calcd for C<sub>22</sub>H<sub>24</sub>N<sub>4</sub>, 345.2074).

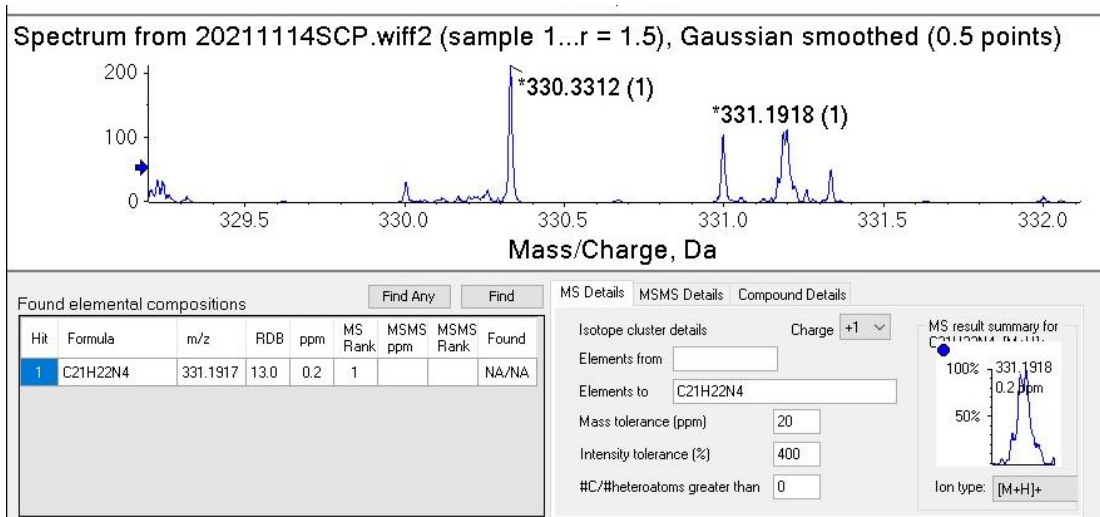

HR-ESI-MS of compound **5s**: 331.1918 [M+H]<sup>+</sup>, (calcd for C<sub>21</sub>H<sub>22</sub>N<sub>4</sub>, 331.1917).

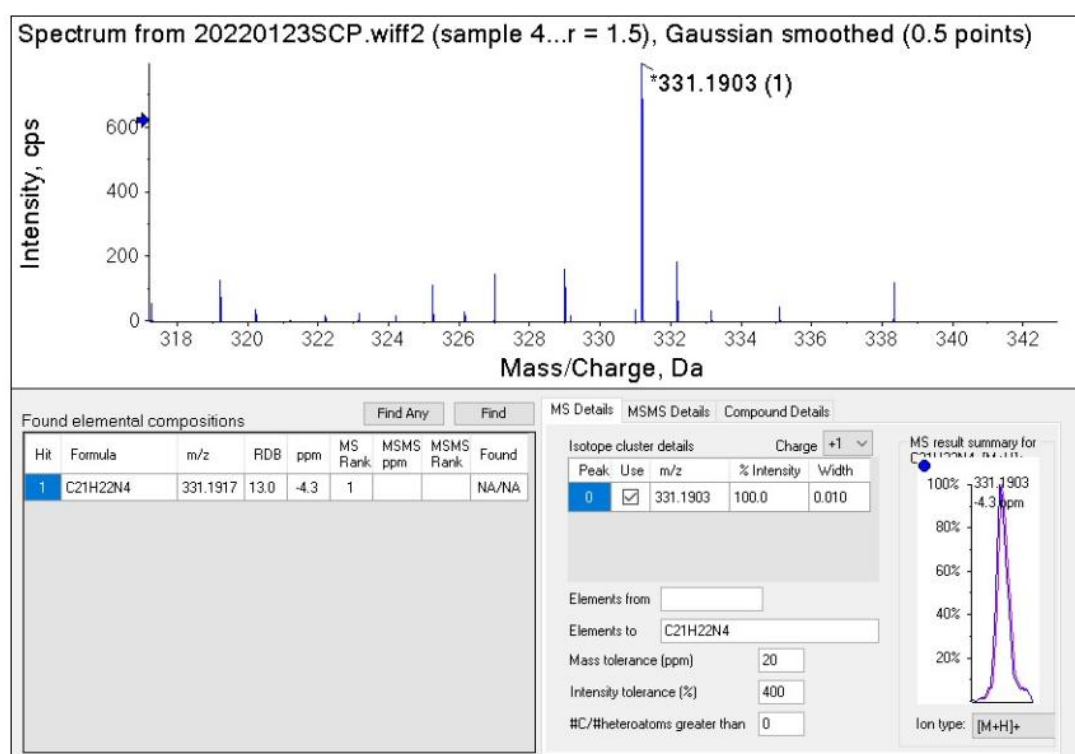

HR-ESI-MS of compound **5t**: 331.1903 [M+H]<sup>+</sup>, (calcd for C<sub>21</sub>H<sub>22</sub>N<sub>4</sub>, 331.1917).

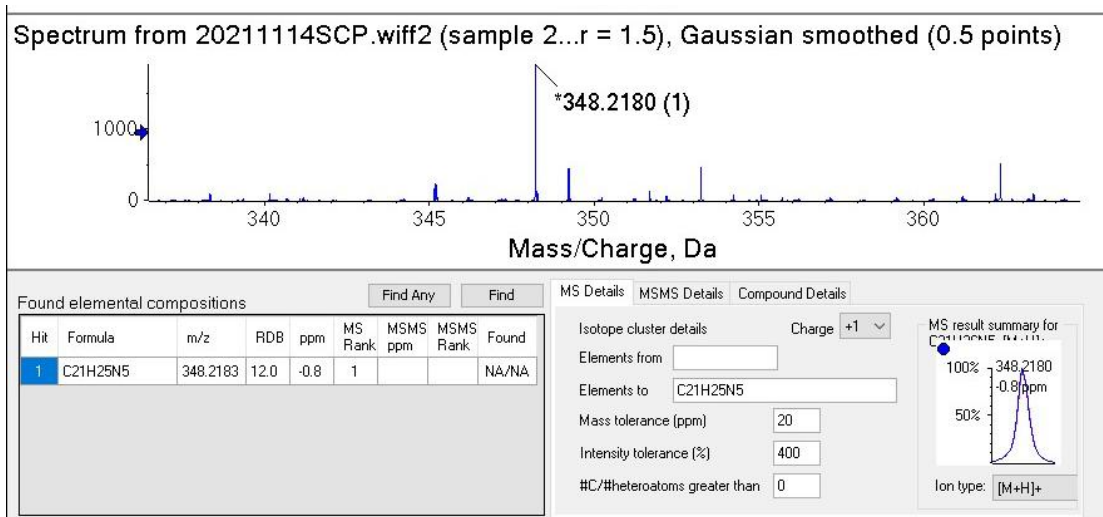

HR-ESI-MS of compound **5u**: 348.2180 [M+H]<sup>+</sup>, (calcd for C<sub>21</sub>H<sub>25</sub>N<sub>5</sub>, 348.2183).

The corresponding data of purity was estimated by HPLC (Essentia SIL-16, UV detection at  $\lambda = 254$  nm) using Agilent ZORBAX Extend C18 ( $4.6 \times 250$  mm,  $5 \mu\text{M}$ ) column. And the elution method used for target compounds was shown below. Mobile phase A (aqueous phase) was 1000 mL purified water. Mobile phase B (organic phase) was chromatographic grade methanol. Gradient elution was set as 30% B for 0-5 min, 50% B for 5-10 min, 70% B for 10-15 min, 95% B for 15-18 min, 30% for 18-21 min. The flow rate and injection volume were set as 1.0 mL/min, and  $10 \mu\text{L}$ , respectively.

For compounds **5a**, **5d**, **5e**, **5g**, **9j**, **5l**, **5o**, and **5p**: Mobile phase A (aqueous phase) was 1000 mL purified water. Mobile phase B (organic phase) was chromatographic grade methanol. Gradient elution was set as 50% B for 0-10 min. The flow rate and injection volume were set as 1.0 mL/min, and  $10 \mu\text{L}$ , respectively.

The HPLC spectra of representative hybrids were as follows.

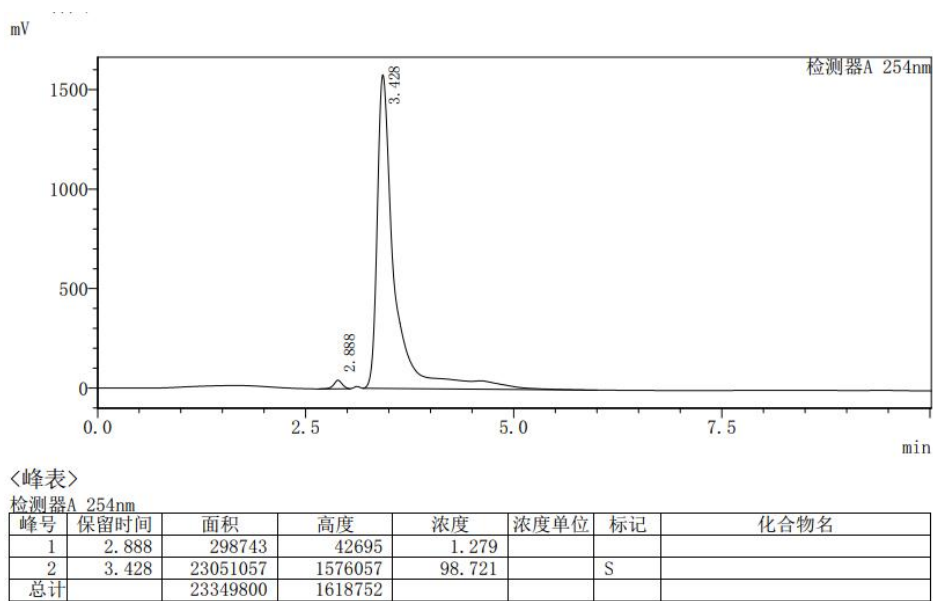

The HPLC trace of **5a**

<色谱图>

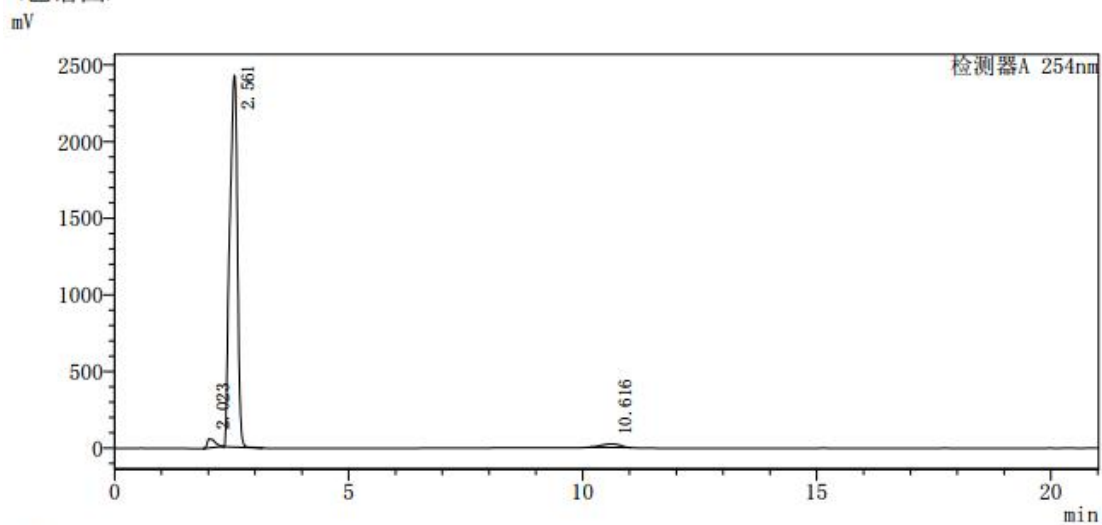

<峰表>

检测器A 254nm

| 峰号 | 保留时间   | 面积       | 高度      | 浓度     | 浓度单位 | 标记 | 化合物名 |
|----|--------|----------|---------|--------|------|----|------|
| 1  | 2.023  | 662233   | 60029   | 2.306  |      | M  |      |
| 2  | 2.561  | 27440024 | 2425572 | 95.534 |      | S  |      |
| 3  | 10.616 | 620636   | 23332   | 2.161  |      | M  |      |
| 总计 |        | 28722892 | 2508932 |        |      |    |      |

The HPLC trace of **5b**

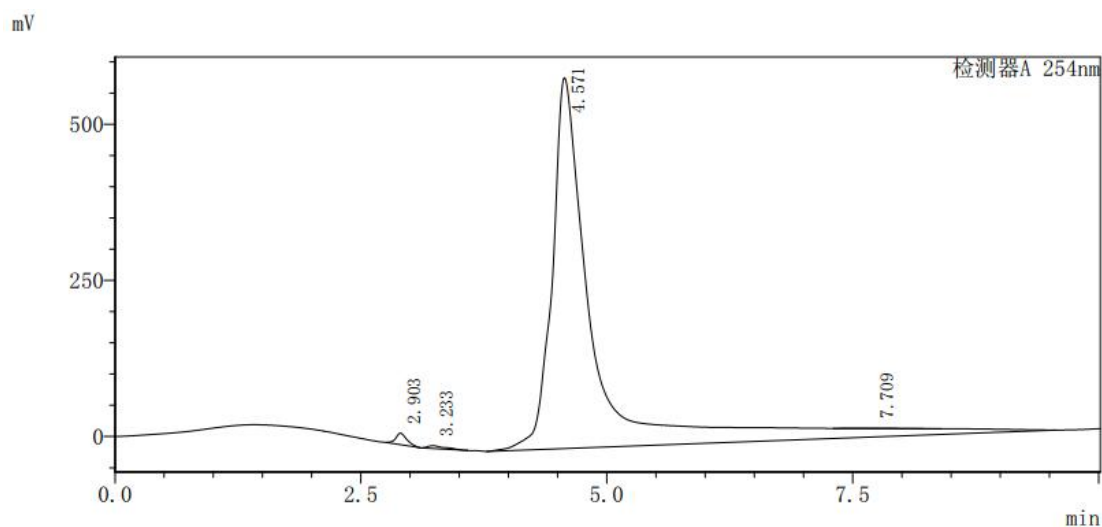

<峰表>

检测器A 254nm

| 峰号 | 保留时间  | 面积       | 高度     | 浓度     | 浓度单位 | 标记 | 化合物名 |
|----|-------|----------|--------|--------|------|----|------|
| 1  | 2.903 | 143812   | 18379  | 0.799  |      |    |      |
| 2  | 3.233 | 57716    | 4643   | 0.321  |      |    |      |
| 3  | 4.571 | 17791100 | 593590 | 98.797 |      | S  |      |
| 4  | 7.709 | 15026    | 402    | 0.083  |      | T  |      |
| 总计 |       | 18007655 | 617014 |        |      |    |      |

The HPLC trace of **5d**

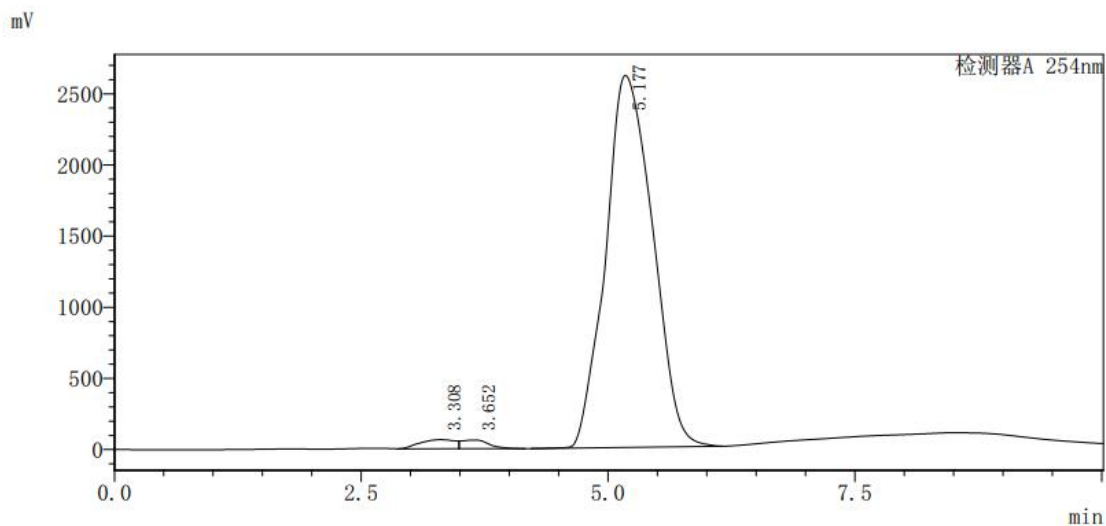

<峰表>

检测器A 254nm

| 峰号 | 保留时间  | 面积       | 高度      | 浓度     | 浓度单位 | 标记 | 化合物名 |
|----|-------|----------|---------|--------|------|----|------|
| 1  | 3.308 | 1596466  | 63604   | 1.786  |      |    |      |
| 2  | 3.652 | 1147242  | 60445   | 1.283  |      | V  |      |
| 3  | 5.177 | 86662698 | 2614147 | 96.931 |      |    |      |
| 总计 |       | 89406407 | 2738196 |        |      |    |      |

The HPLC trace of **5e**

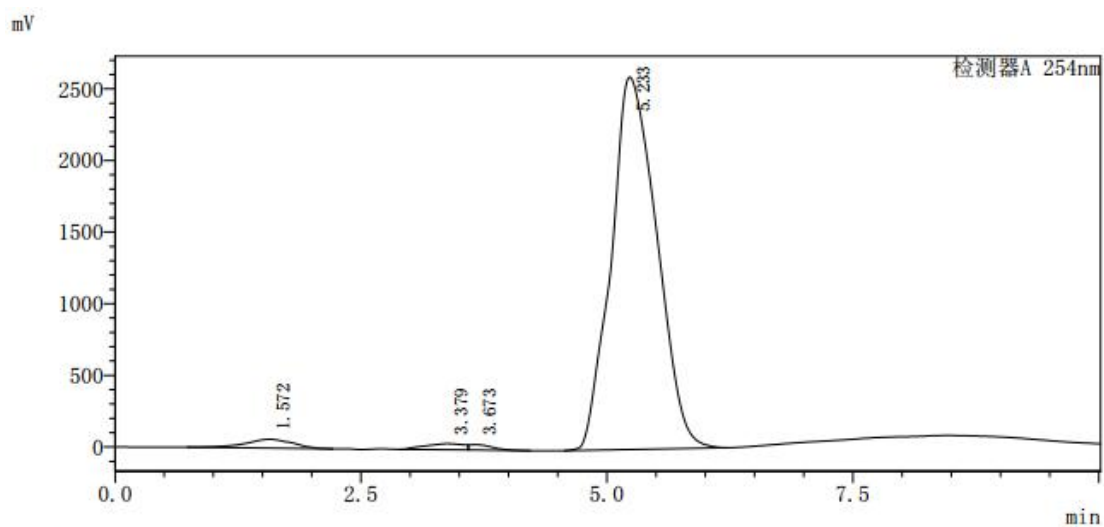

<峰表>

检测器A 254nm

| 峰号 | 保留时间  | 面积       | 高度      | 浓度     | 浓度单位 | 标记 | 化合物名 |
|----|-------|----------|---------|--------|------|----|------|
| 1  | 1.572 | 2045322  | 62236   | 2.331  |      |    |      |
| 2  | 3.379 | 1181049  | 42894   | 1.346  |      |    |      |
| 3  | 3.673 | 605209   | 37898   | 0.690  |      | V  |      |
| 4  | 5.233 | 83900037 | 2599461 | 95.633 |      |    |      |
| 总计 |       | 87731617 | 2742489 |        |      |    |      |

The HPLC trace of **5g**

<色谱图>

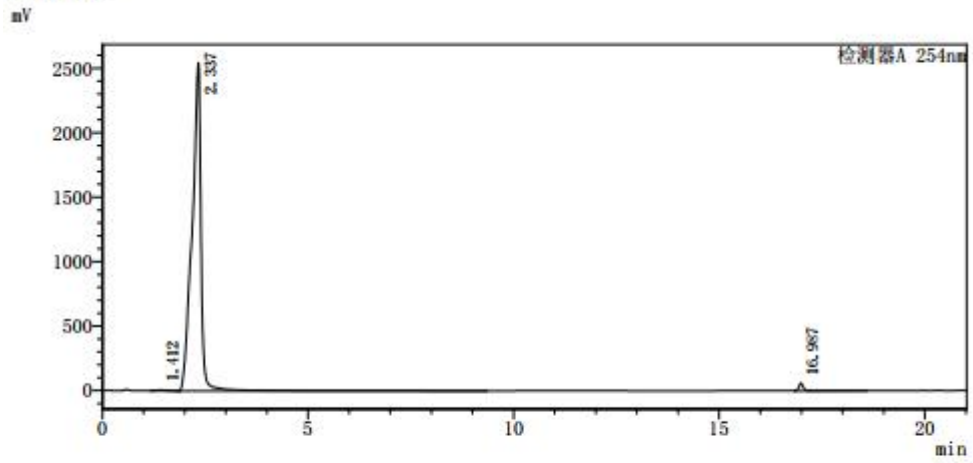

<峰表>

| 峰号 | 保留时间   | 面积       | 高度      | 浓度     | 浓度单位 | 标记 | 化合物名 |
|----|--------|----------|---------|--------|------|----|------|
| 1  | 1.412  | 101601   | 6551    | 0.261  |      | V  |      |
| 2  | 2.337  | 38398408 | 2544712 | 98.616 |      |    |      |
| 3  | 16.987 | 437403   | 58732   | 1.123  |      | SV |      |
| 总计 |        | 38937411 | 2609994 |        |      |    |      |

The HPLC trace of **5h**

<色谱图>

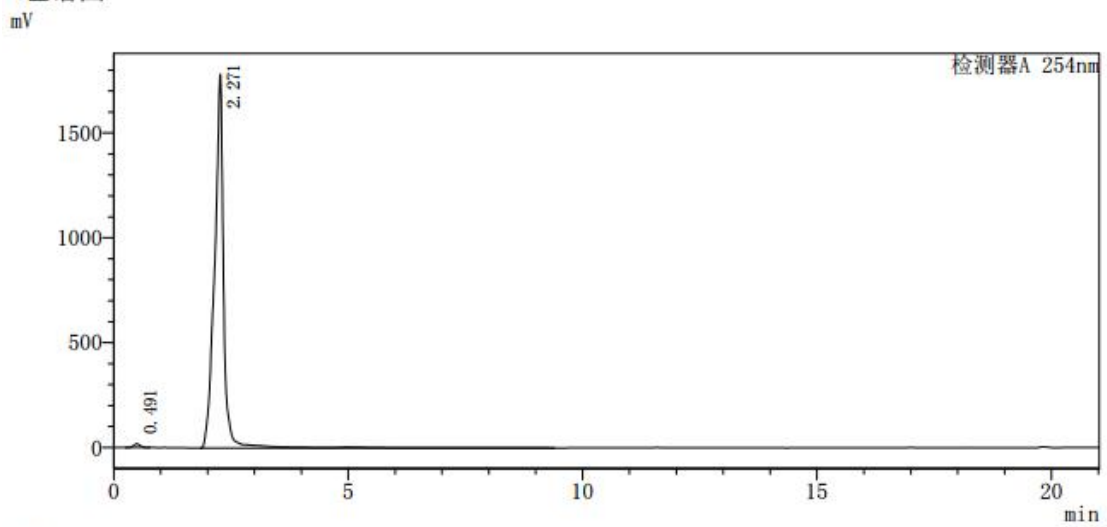

<峰表>

| 峰号 | 保留时间  | 面积       | 高度      | 浓度     | 浓度单位 | 标记 | 化合物名 |
|----|-------|----------|---------|--------|------|----|------|
| 1  | 0.491 | 167969   | 17710   | 0.697  |      |    |      |
| 2  | 2.271 | 23931541 | 1781828 | 99.303 |      | S  |      |
| 总计 |       | 24099510 | 1799538 |        |      |    |      |

The HPLC trace of **5i**

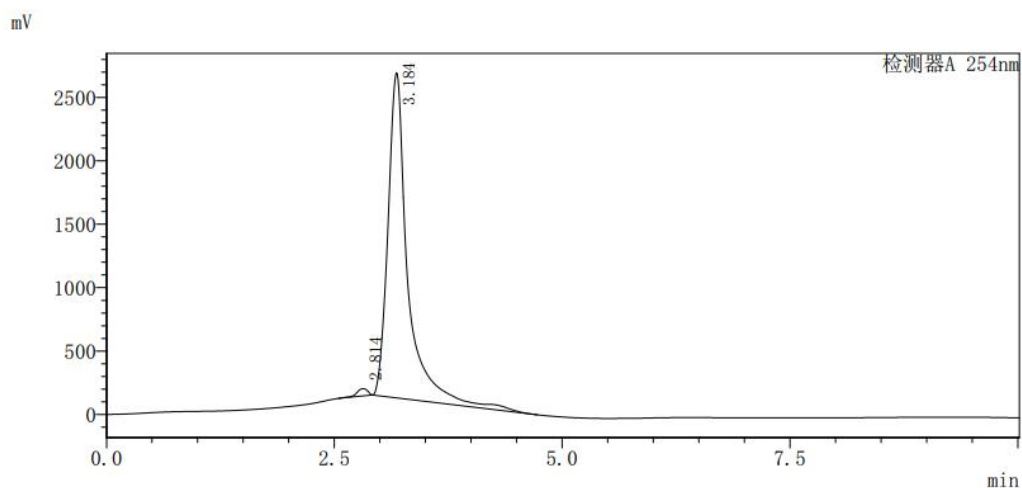

<峰表>

检测器A 254nm

| 峰号 | 保留时间  | 面积       | 高度      | 浓度     | 浓度单位 | 标记 | 化合物名 |
|----|-------|----------|---------|--------|------|----|------|
| 1  | 2.814 | 472212   | 57717   | 1.205  |      | M  |      |
| 2  | 3.184 | 38706970 | 2565155 | 98.795 |      |    |      |
| 总计 |       | 39179182 | 2622872 |        |      |    |      |

The HPLC trace of 5j

<色谱图>

mV

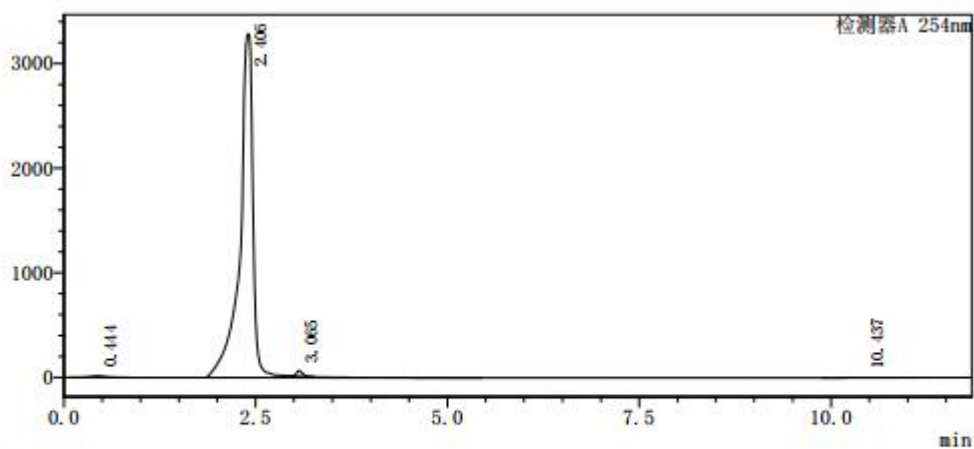

<峰表>

检测器A 254nm

| 峰号 | 保留时间   | 面积       | 高度      | 浓度     | 浓度单位 | 标记 | 化合物名 |
|----|--------|----------|---------|--------|------|----|------|
| 1  | 0.444  | 247496   | 14985   | 0.623  |      |    |      |
| 2  | 2.406  | 39164025 | 3286447 | 98.525 |      | SV |      |
| 3  | 3.065  | 296812   | 53575   | 0.747  |      | T  |      |
| 4  | 10.437 | 42057    | 1570    | 0.106  |      |    |      |
| 总计 |        | 39750390 | 3356577 |        |      |    |      |

The HPLC trace of 5k



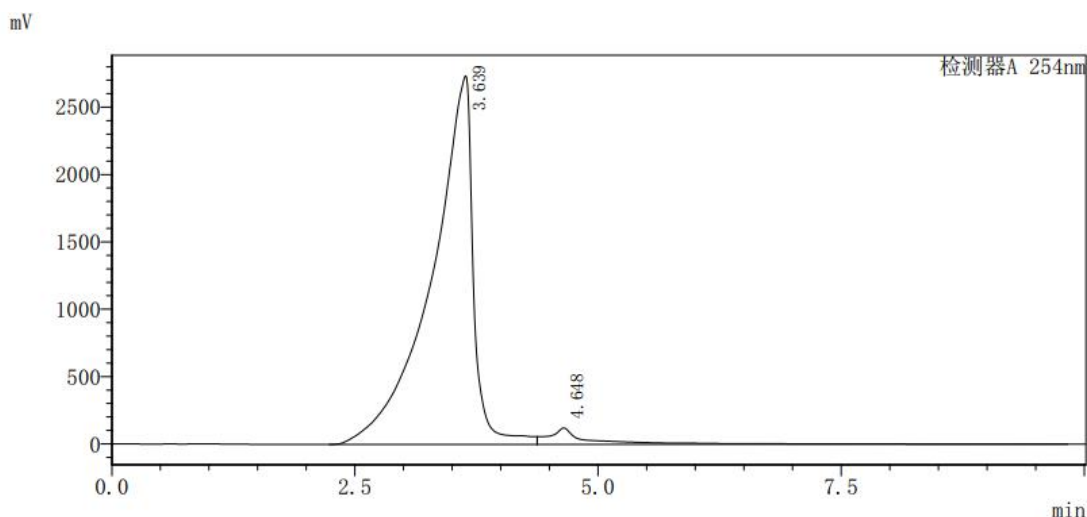

<峰表>

检测器A 254nm

| 峰号 | 保留时间  | 面积       | 高度      | 浓度     | 浓度单位 | 标记 | 化合物名 |
|----|-------|----------|---------|--------|------|----|------|
| 1  | 3.639 | 81239852 | 2735635 | 95.604 |      |    |      |
| 2  | 4.648 | 3735714  | 121808  | 4.396  |      | SV |      |
| 总计 |       | 84975566 | 2857442 |        |      |    |      |

The HPLC trace of 5I

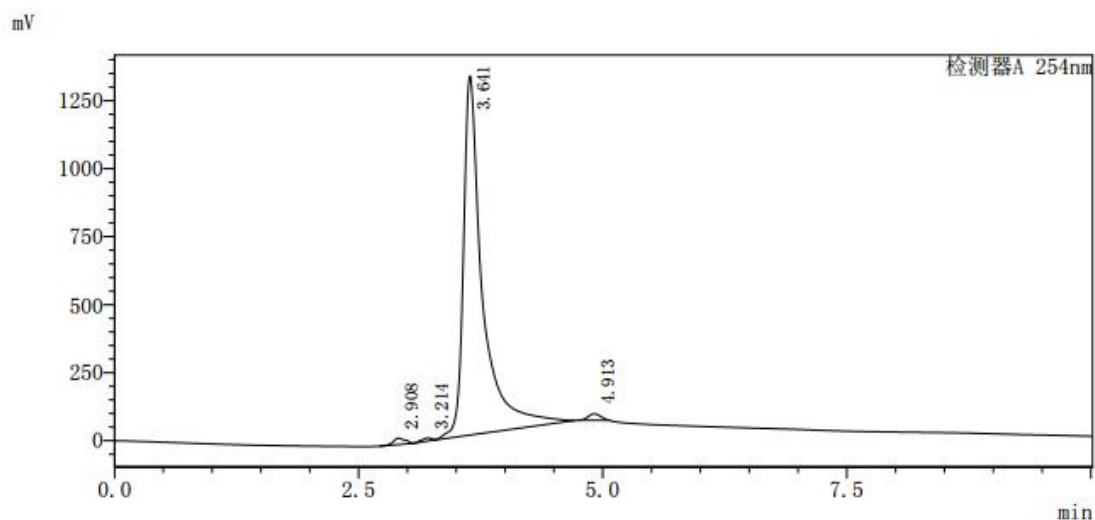

<峰表>

检测器A 254nm

| 峰号 | 保留时间  | 面积       | 高度      | 浓度     | 浓度单位 | 标记 | 化合物名 |
|----|-------|----------|---------|--------|------|----|------|
| 1  | 2.908 | 202016   | 23446   | 1.093  |      |    |      |
| 2  | 3.214 | 84805    | 11033   | 0.459  |      |    |      |
| 3  | 3.641 | 17975869 | 1319931 | 97.264 |      | M  |      |
| 4  | 4.913 | 218820   | 24060   | 1.184  |      | M  |      |
| 总计 |       | 18481510 | 1378469 |        |      |    |      |

The HPLC trace of 5O

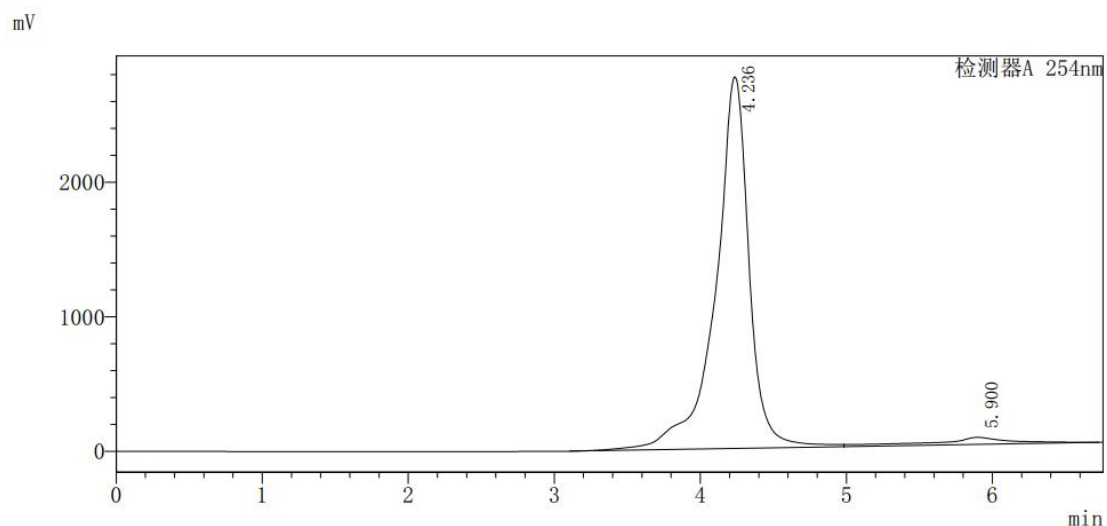

<峰表>

检测器A 254nm

| 峰号 | 保留时间  | 面积       | 高度      | 浓度     | 浓度单位 | 标记 | 化合物名 |
|----|-------|----------|---------|--------|------|----|------|
| 1  | 4.236 | 44184130 | 2759688 | 95.831 |      |    |      |
| 2  | 5.900 | 1922104  | 52401   | 4.169  |      | V  |      |
| 总计 |       | 46106234 | 2812089 |        |      |    |      |

The HPLC trace of **5p**

<色谱图>

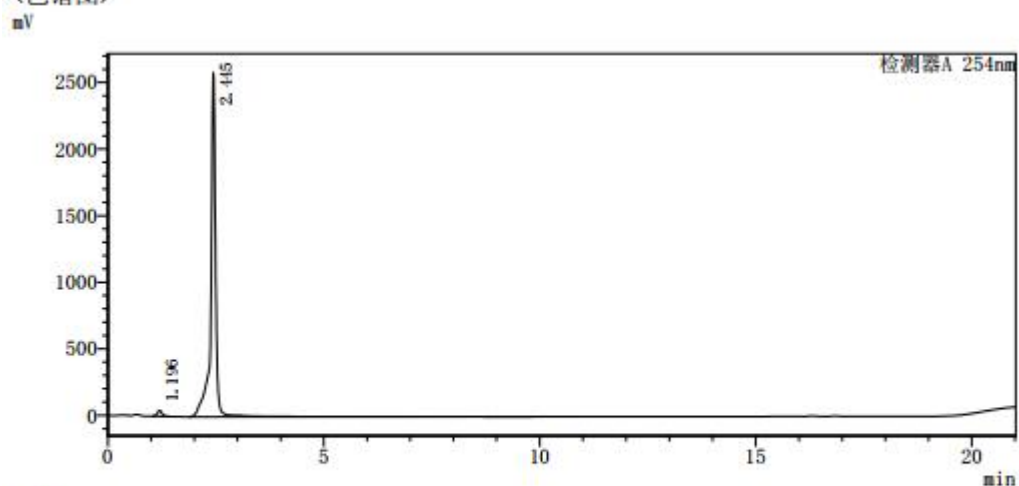

<峰表>

检测器A 254nm

| 峰号 | 保留时间  | 面积       | 高度      | 浓度     | 浓度单位 | 标记 | 化合物名 |
|----|-------|----------|---------|--------|------|----|------|
| 1  | 1.196 | 325459   | 43938   | 1.603  |      | V  |      |
| 2  | 2.445 | 19974429 | 2583315 | 98.397 |      | S  |      |
| 总计 |       | 20299888 | 2627254 |        |      |    |      |

The HPLC trace of **5r**

<色谱图>

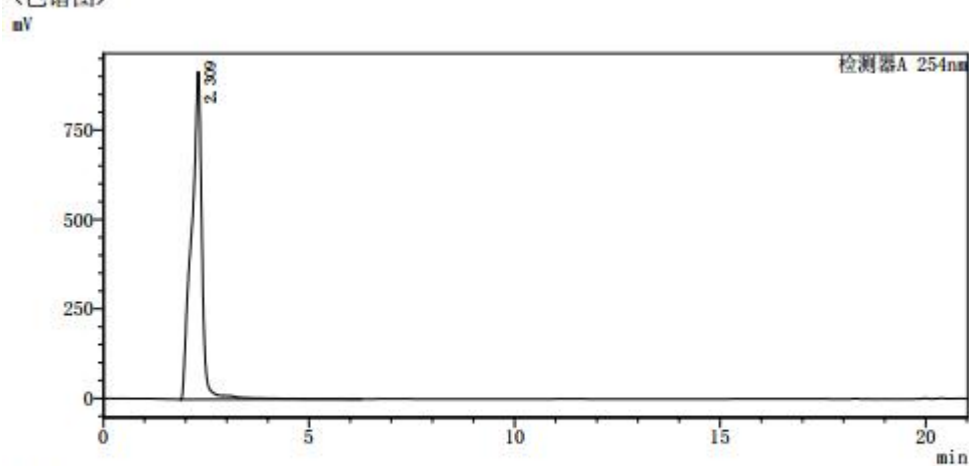

<峰表>

| 检测器A 254nm |       |          |        |         |      |    |      |
|------------|-------|----------|--------|---------|------|----|------|
| 峰号         | 保留时间  | 面积       | 高度     | 浓度      | 浓度单位 | 标记 | 化合物名 |
| 1          | 2.309 | 16213124 | 915667 | 100.000 |      | S  |      |
| 总计         |       | 16213124 | 915667 |         |      |    |      |

The HPLC trace of 5s

<色谱图>

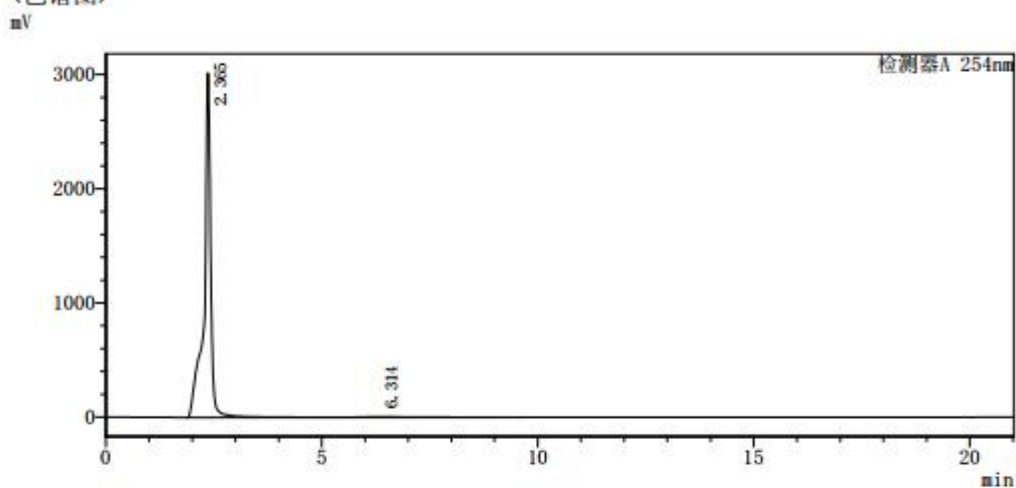

<峰表>

| 检测器A 254nm |       |          |         |        |      |    |      |
|------------|-------|----------|---------|--------|------|----|------|
| 峰号         | 保留时间  | 面积       | 高度      | 浓度     | 浓度单位 | 标记 | 化合物名 |
| 1          | 2.365 | 32315679 | 3015990 | 98.573 |      | S  |      |
| 2          | 6.314 | 467680   | 4652    | 1.427  |      | T  |      |
| 总计         |       | 32783360 | 3020642 |        |      |    |      |

The HPLC trace of 5t

<色谱图>

mV

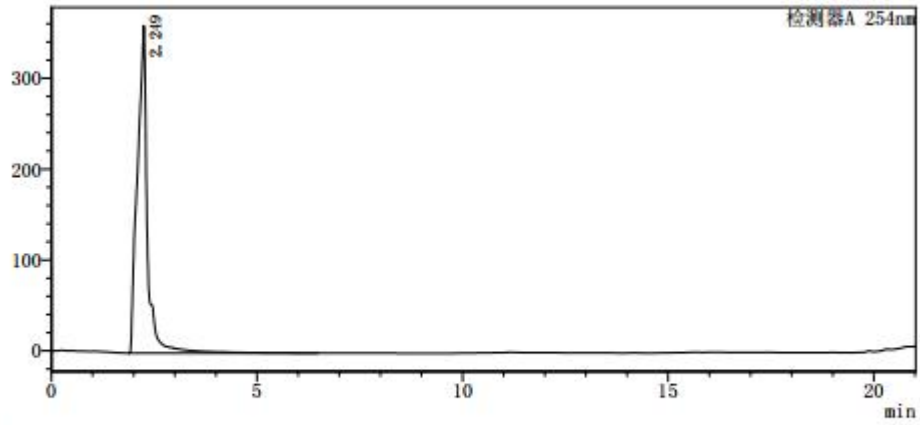

<峰表>

检测器A 254nm

| 峰号 | 保留时间  | 面积      | 高度     | 浓度      | 浓度单位 | 标记 | 化合物名 |
|----|-------|---------|--------|---------|------|----|------|
| 1  | 2.249 | 6154694 | 360519 | 100.000 |      |    |      |
| 总计 |       | 6154694 | 360519 |         |      |    |      |

The HPLC trace of **5u**
